# Supplementary material for: Estimating the impact of implementation and timing of the COVID-19 vaccination programme in Brazil: a counterfactual analysis
Source: bioRxiv or medRxiv preprint supplement (doi:10.1101/2021.12.24.21268384), 2022-11-03
Supplement: Supplementary file [file media-1.pdf]

# Supplementary Material - Estimating the impact of implementation and timing of COVID-19 vaccination program in Brazil: a counterfactual analysis

Leonardo Souto Ferreira<sup>1,2,\*</sup>, Flávia Maria Darcie Marquitti<sup>2,3</sup>, Rafael Lopes Paixão da Silva<sup>1,2</sup>, Marcelo Eduardo Borges<sup>2</sup>, Marcelo F C Gomes<sup>2,4</sup>, Oswaldo G Cruz<sup>2,4</sup>, Roberto André Kraenkel<sup>1,2</sup>, Renato Mendes Coutinho<sup>2,5</sup>, Paulo Inácio Prado<sup>2,6</sup>, and Leonardo S Bastos<sup>2,4</sup>

<sup>1</sup>*Instituto de Física Teórica, Universidade Estadual Paulista, São Paulo, Brazil*

<sup>2</sup>*Observatório COVID-19 BR*

<sup>3</sup>*Instituto de Física 'Gleb Wataghin' and Instituto de Biologia, Universidade Estadual de Campinas, Campinas, Brazil*

<sup>4</sup>*Programa de Computação Científica, Fundação Oswaldo Cruz, Rio de Janeiro, Brazil*

<sup>5</sup>*Centro de Matemática, Computação e Cognição, Universidade Federal do ABC, Santo André, Brazil*

<sup>6</sup>*Instituto de Biociências, Universidade de São Paulo, São Paulo, Brazil*

\* *Corresponding author: leonardo.souto@unesp.br*

December 24, 2021

This supplementary material contains a graphical measurement of fitting quality, a figure of vaccine coverage during the period analysed and the graphical results for individual states. The tabulated results for each state is available in our repository at <https://github.com/covid19br/bayes-vacina-paper> together with the code used to generate the results.

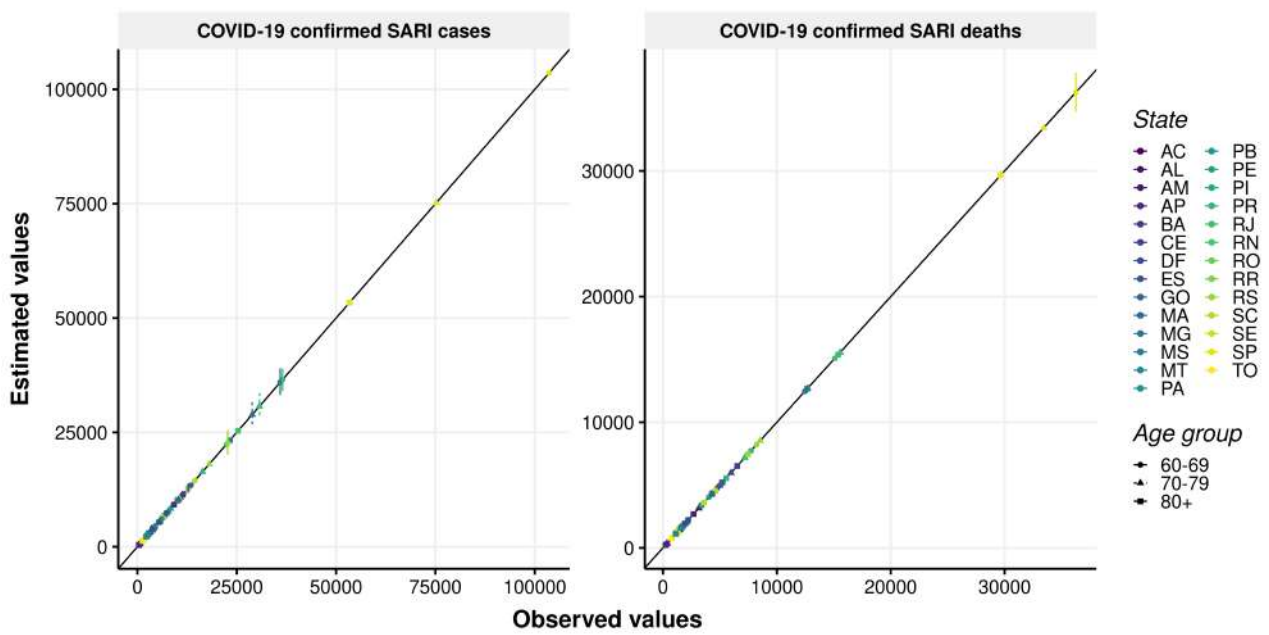

**Figure 1:** Estimated value of outcome (facet) as a function of the observed value, per state (color) and age group (point type). A black line with  $45^\circ$  inclination is plotted for reference. The nearer the line the better.

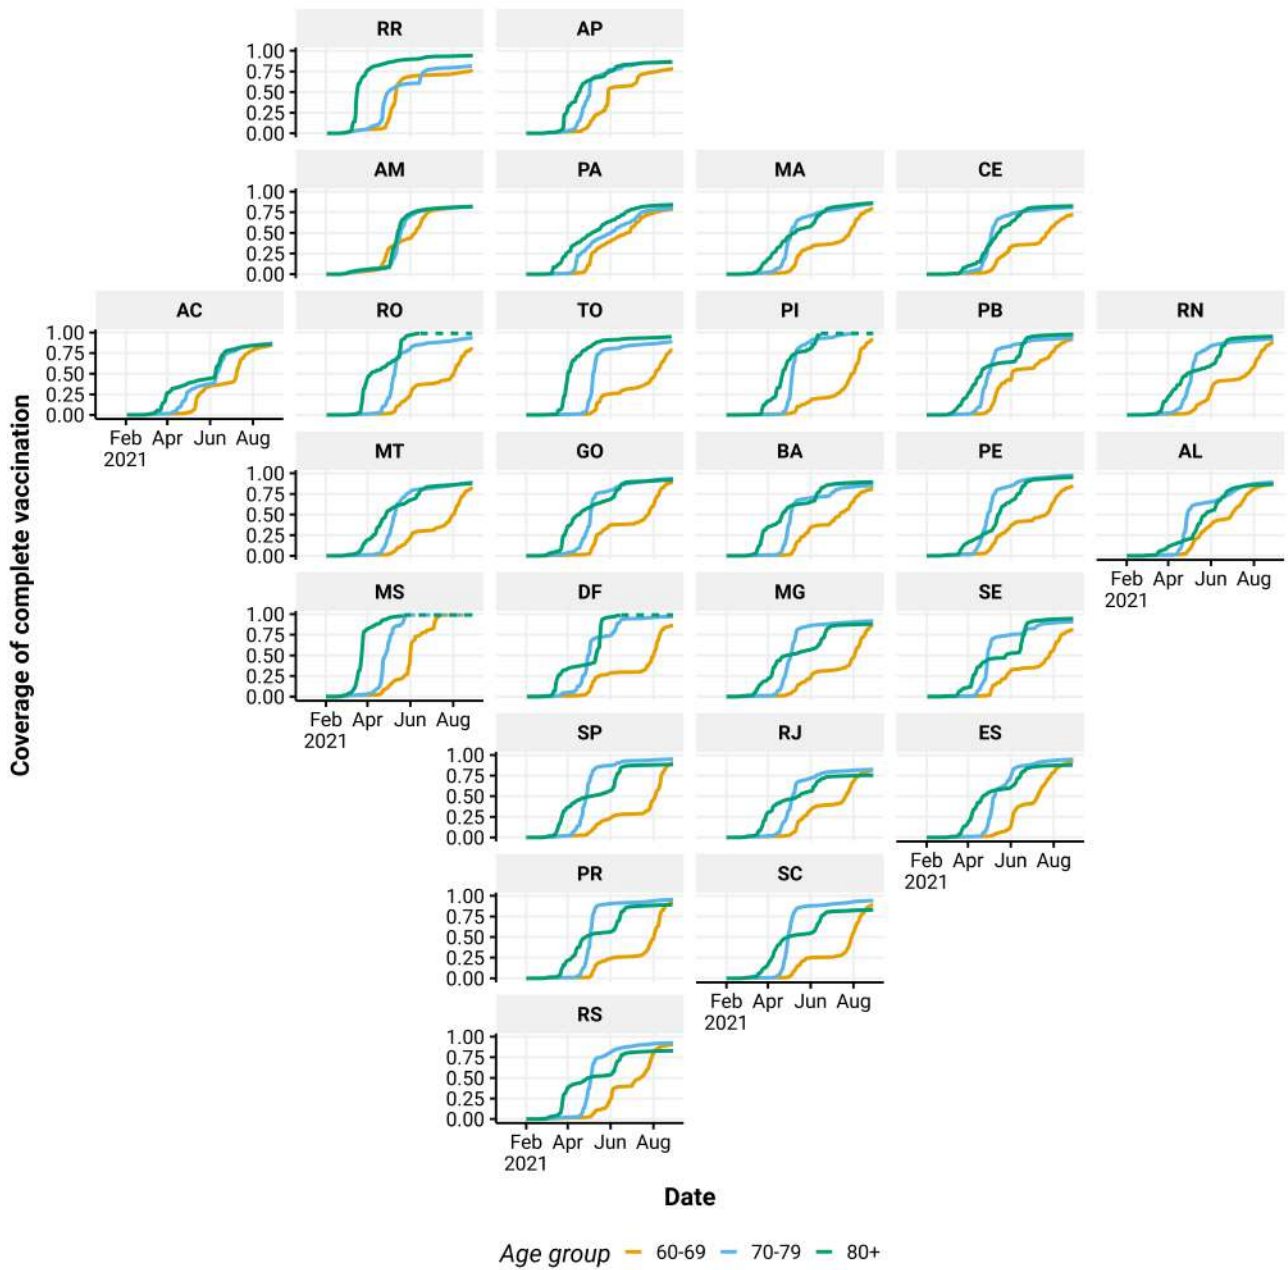

**Figure 2:** Vaccine coverage per age group. Due to imprecise estimates of population size, some age groups surpassed 100% coverage and these cases are denoted with a dashed line.

# 1 Results

## 1.1 North Region

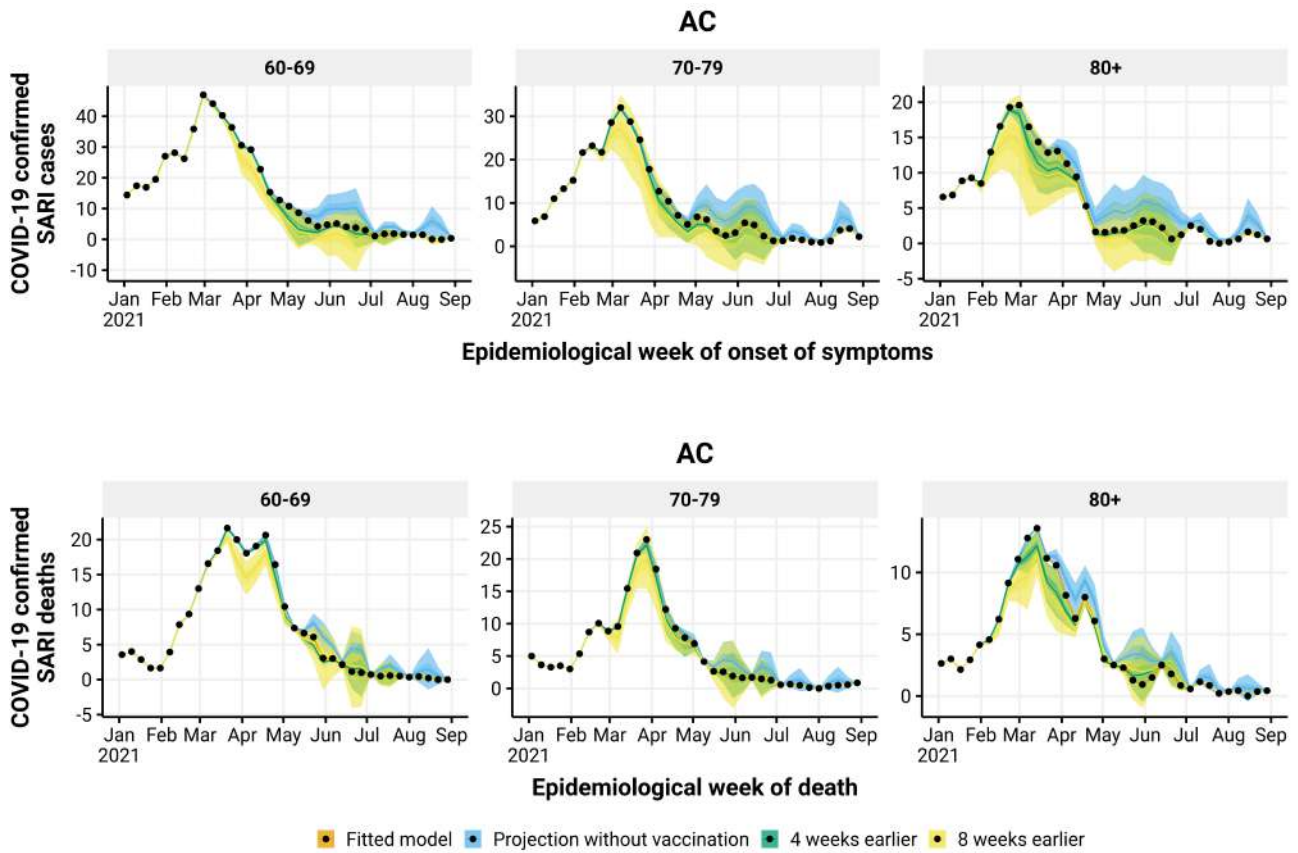

**Figure 3:** Estimated number of hospitalizations (top) and deaths (bottom) by epidemiological week with the realized (orange), no vaccination (blue), 4 (green) and 8 (yellow) weeks earlier vaccination rollout, by age group (panels), in AC state. The observed number of hospitalizations and deaths are given by the black points.

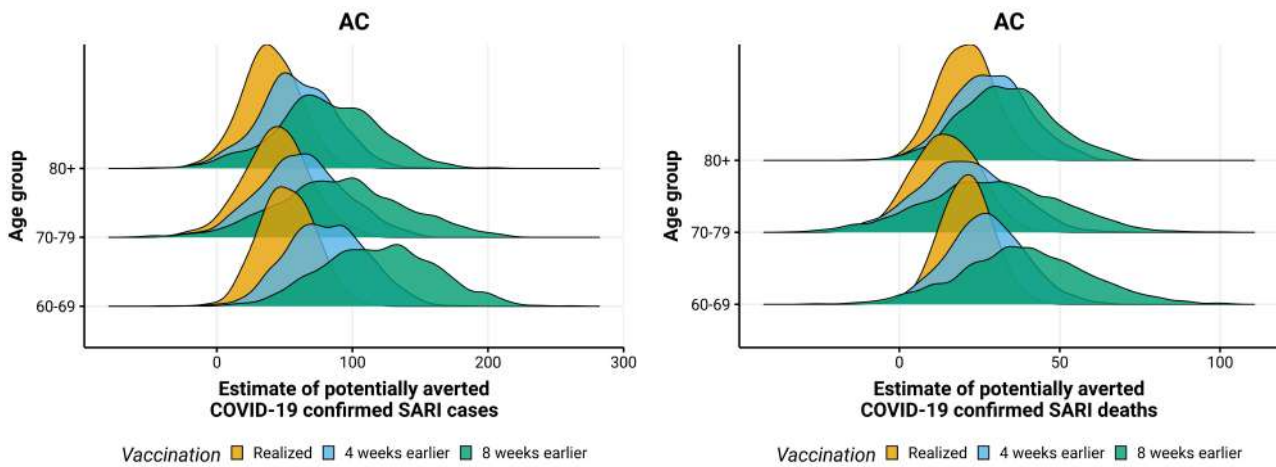

**Figure 4:** Posterior distribution of hospitalizations (left) and deaths (right) potentially averted by vaccination between 2021-01-01 and 2021-08-29 by age group, with the realized (orange), 4 (blue) and 8 weeks earlier (green) vaccination rollout in AC state.

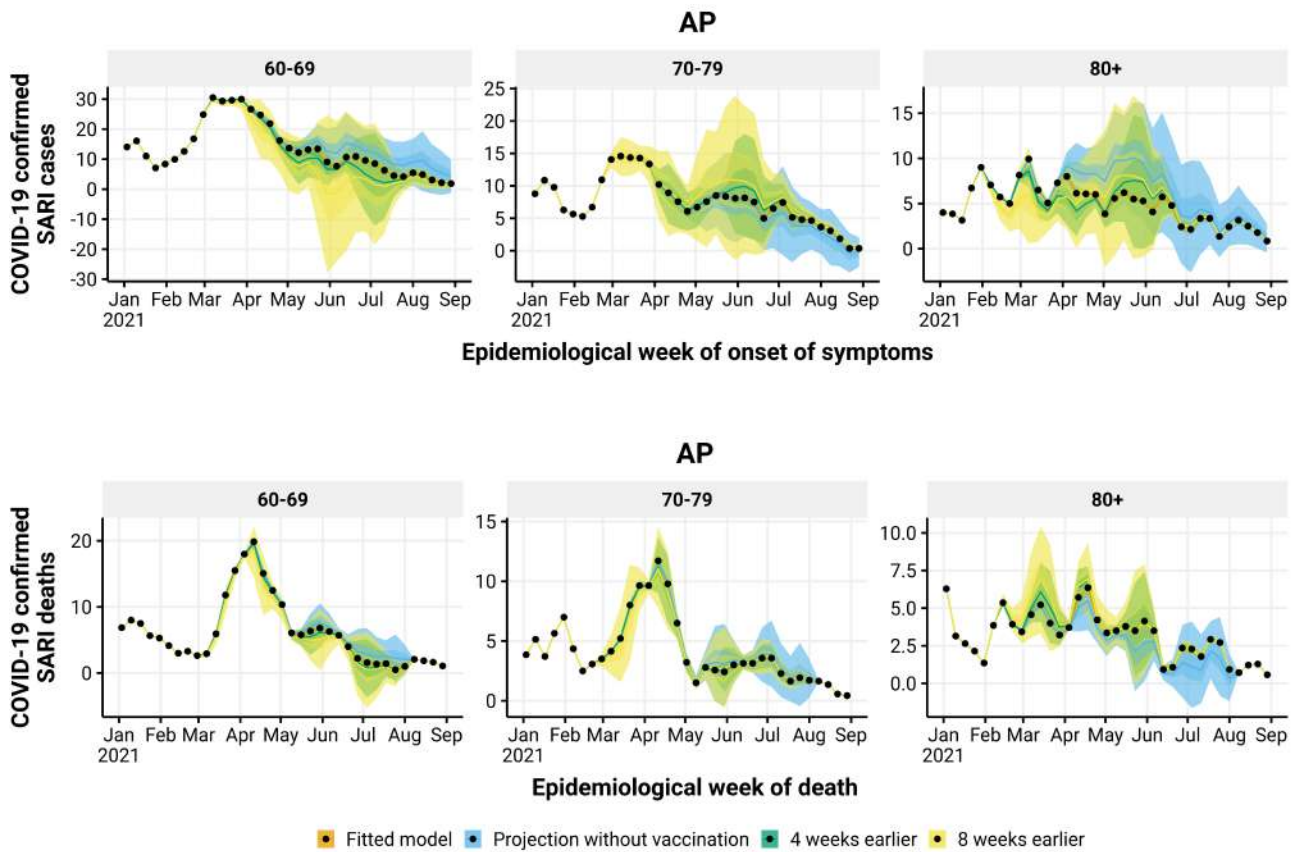

**Figure 5:** Estimated number of hospitalizations (top) and deaths (bottom) by epidemiological week with the realized (orange), no vaccination (blue), 4 (green) and 8 (yellow) weeks earlier vaccination rollout, by age group (panels), in AP state. The observed number of hospitalizations and deaths are given by the black points.

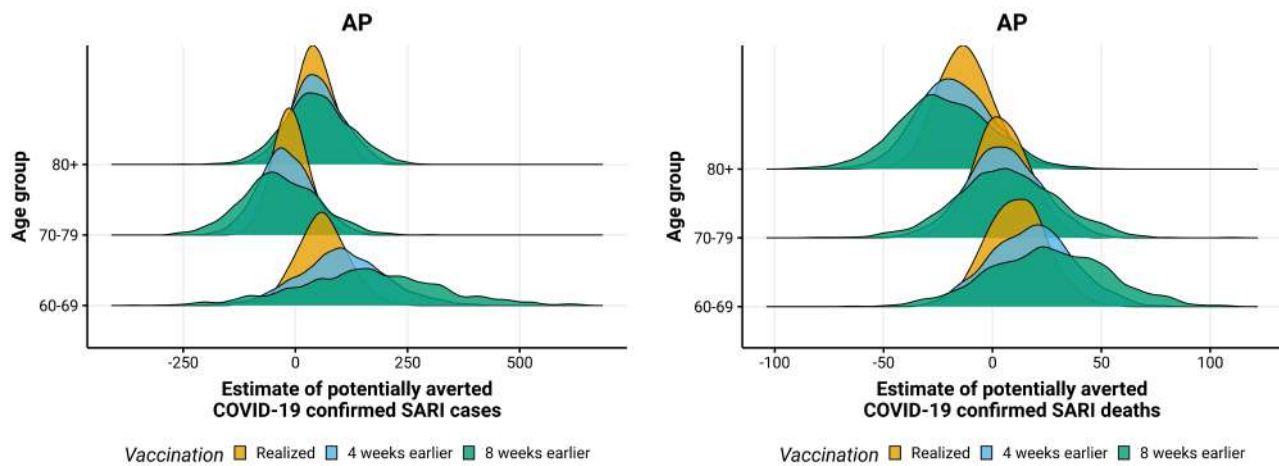

**Figure 6:** Posterior distribution of hospitalizations (left) and deaths (right) potentially averted by vaccination between 2021-01-01 and 2021-08-29 by age group, with the realized (orange), 4 (blue) and 8 weeks earlier (green) vaccination rollout in AP state.

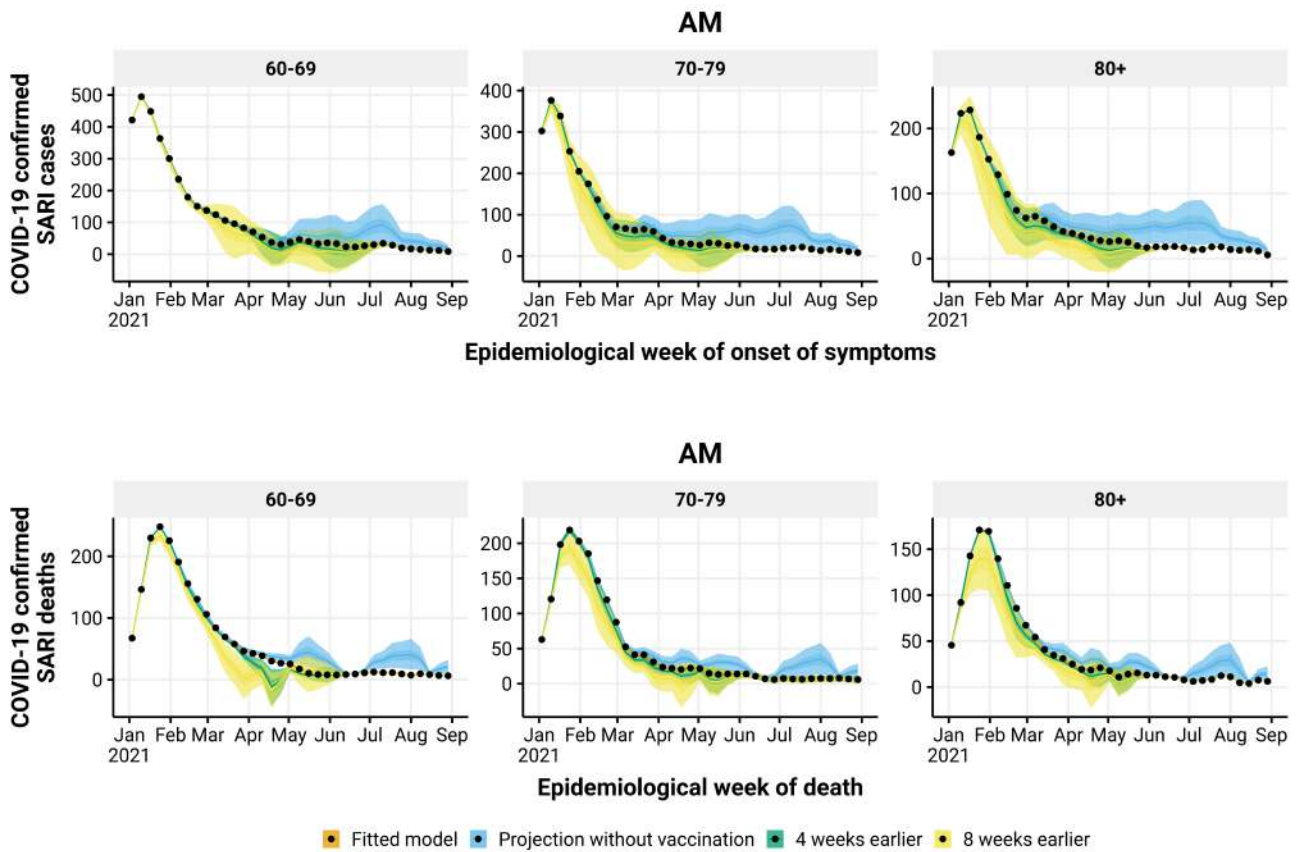

**Figure 7:** Estimated number of hospitalizations (top) and deaths (bottom) by epidemiological week with the realized (orange), no vaccination (blue), 4 (green) and 8 (yellow) weeks earlier vaccination rollout, by age group (panels), in AM state. The observed number of hospitalizations and deaths are given by the black points.

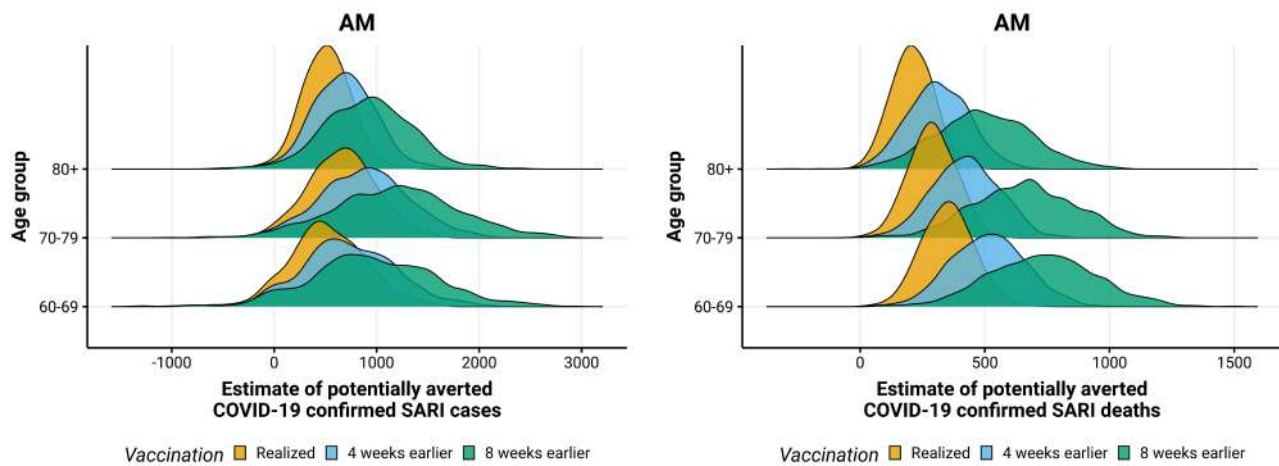

**Figure 8:** Posterior distribution of hospitalizations (left) and deaths (right) potentially averted by vaccination between 2021-01-01 and 2021-08-29 by age group, with the realized (orange), 4 (blue) and 8 weeks earlier (green) vaccination rollout in AM state.

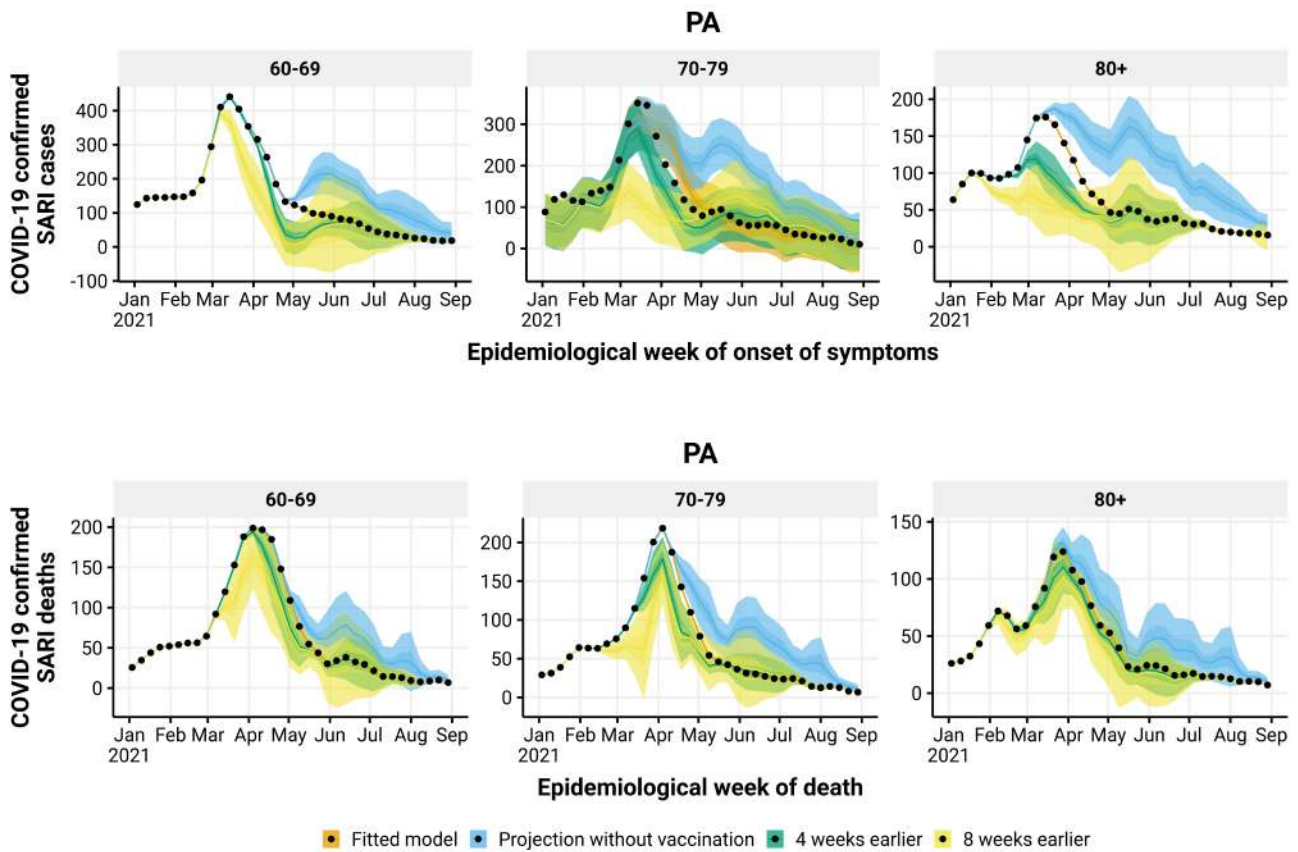

**Figure 9:** Estimated number of hospitalizations (top) and deaths (bottom) by epidemiological week with the realized (orange), no vaccination (blue), 4 (green) and 8 (yellow) weeks earlier vaccination rollout, by age group (panels), in PA state. The observed number of hospitalizations and deaths are given by the black points.

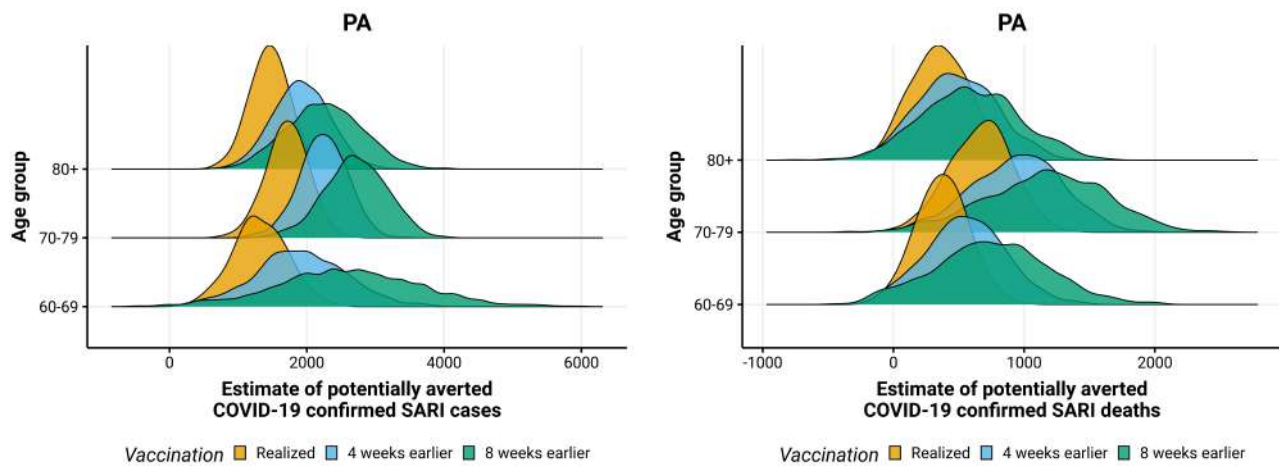

**Figure 10:** Posterior distribution of hospitalizations (left) and deaths (right) potentially averted by vaccination between 2021-01-01 and 2021-08-29 by age group, with the realized (orange), 4 (blue) and 8 weeks earlier (green) vaccination rollout in PA state.

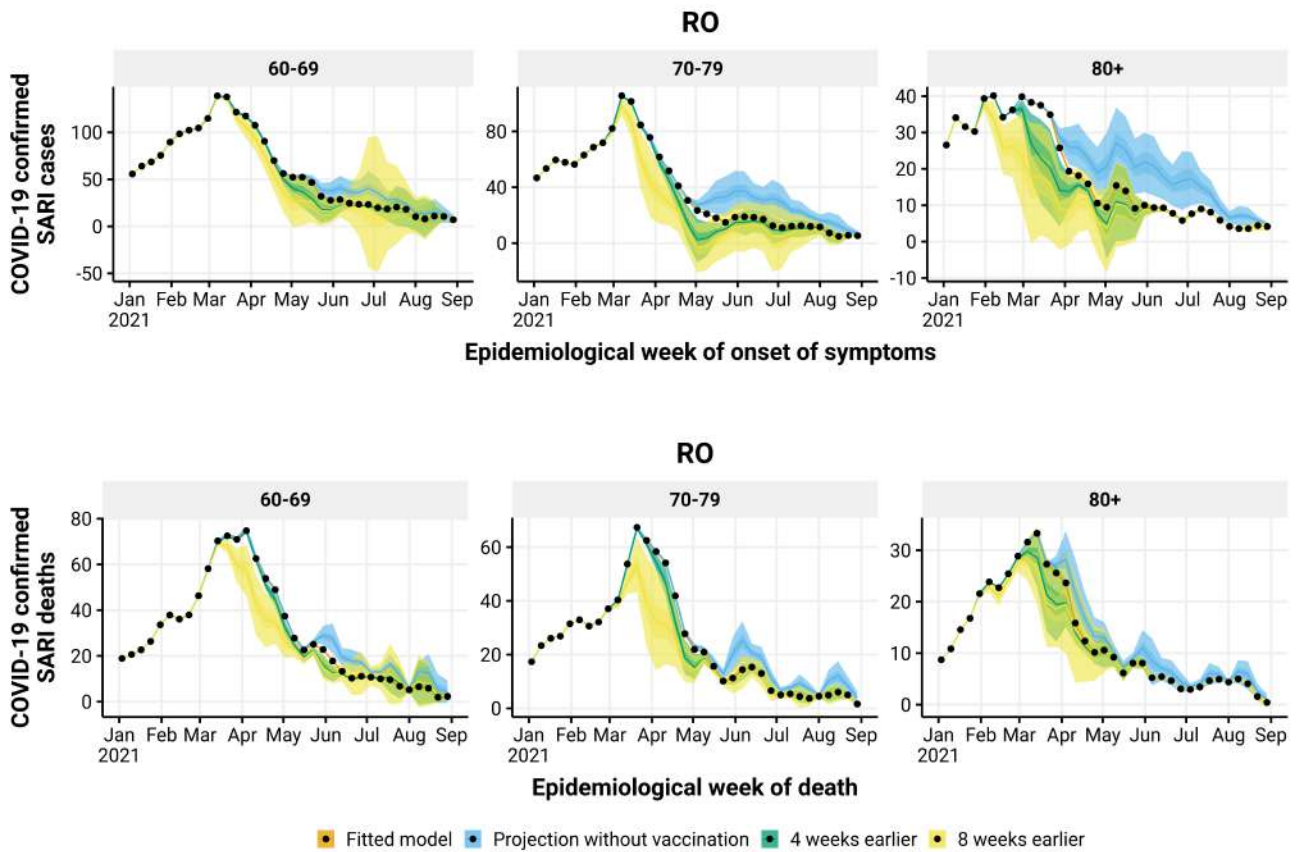

**Figure 11:** Estimated number of hospitalizations (top) and deaths (bottom) by epidemiological week with the realized (orange), no vaccination (blue), 4 (green) and 8 (yellow) weeks earlier vaccination rollout, by age group (panels), in RO state. The observed number of hospitalizations and deaths are given by the black points.

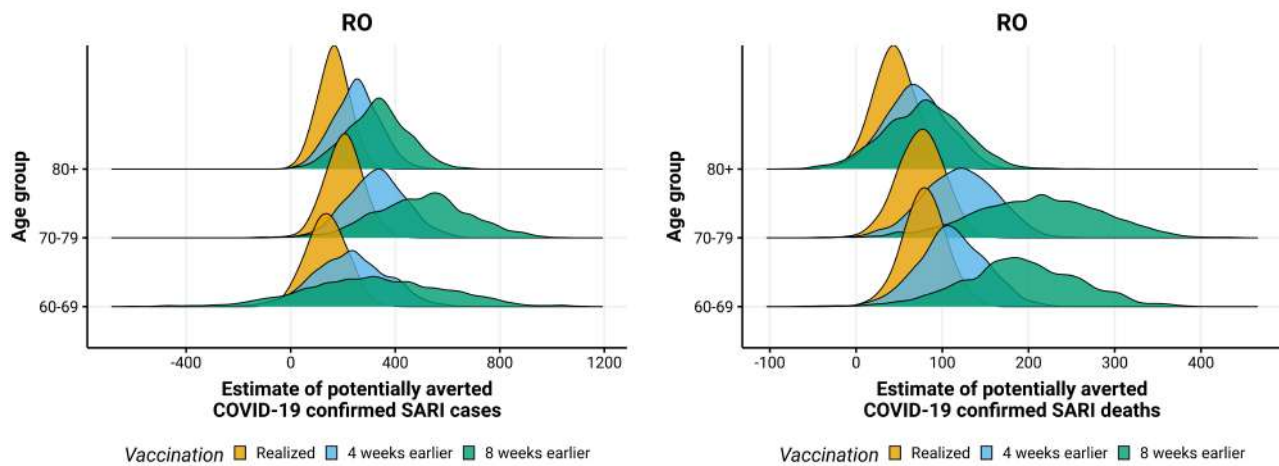

**Figure 12:** Posterior distribution of hospitalizations (left) and deaths (right) potentially averted by vaccination between 2021-01-01 and 2021-08-29 by age group, with the realized (orange), 4 (blue) and 8 weeks earlier (green) vaccination rollout in RO state.



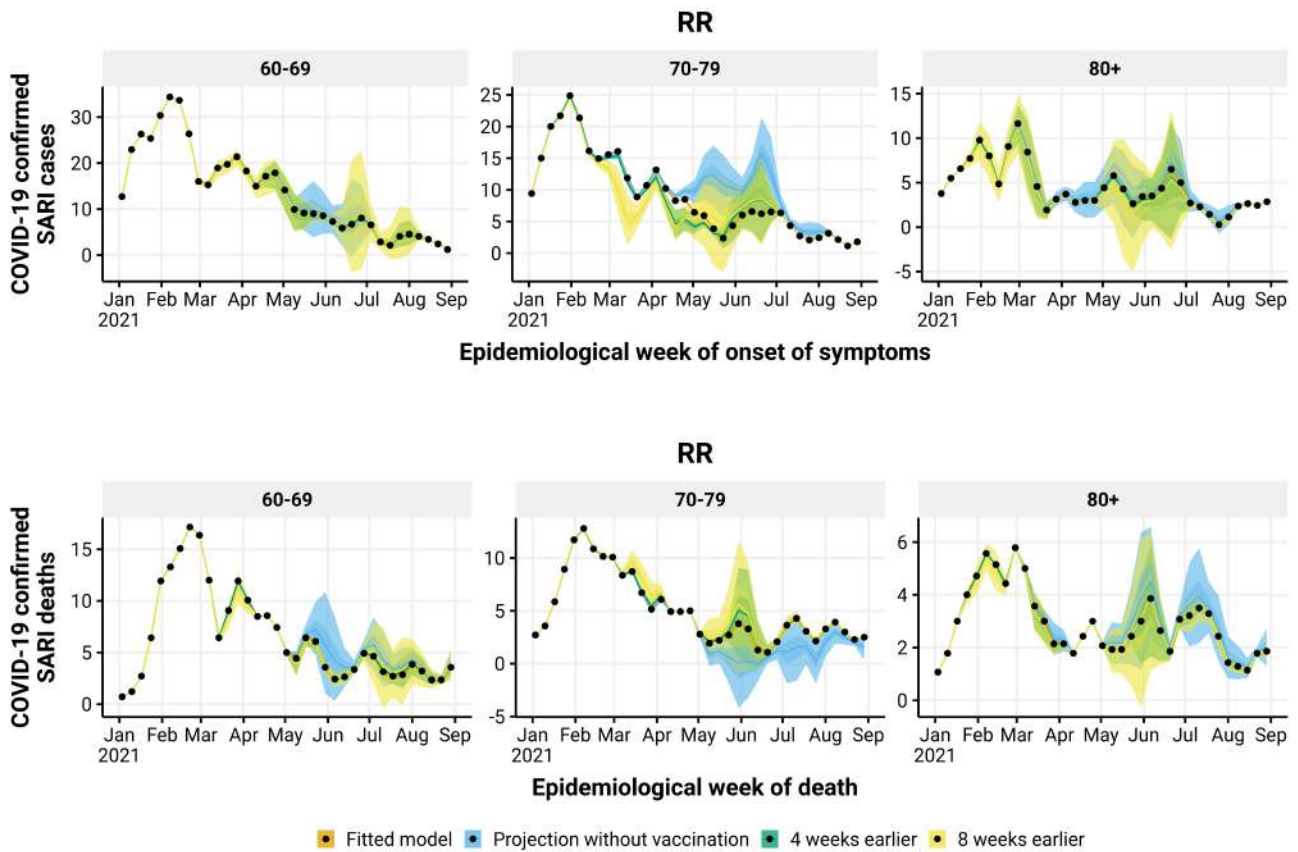

**Figure 13:** Estimated number of hospitalizations (top) and deaths (bottom) by epidemiological week with the realized (orange), no vaccination (blue), 4 (green) and 8 (yellow) weeks earlier vaccination rollout, by age group (panels), in RR state. The observed number of hospitalizations and deaths are given by the black points.

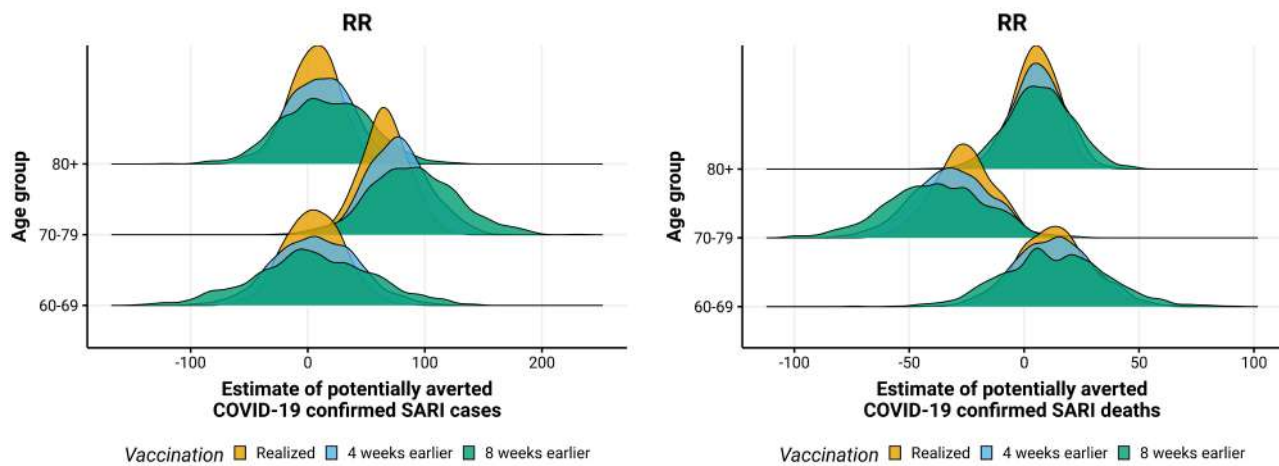

**Figure 14:** Posterior distribution of hospitalizations (left) and deaths (right) potentially averted by vaccination between 2021-01-01 and 2021-08-29 by age group, with the realized (orange), 4 (blue) and 8 weeks earlier (green) vaccination rollout in RR state.

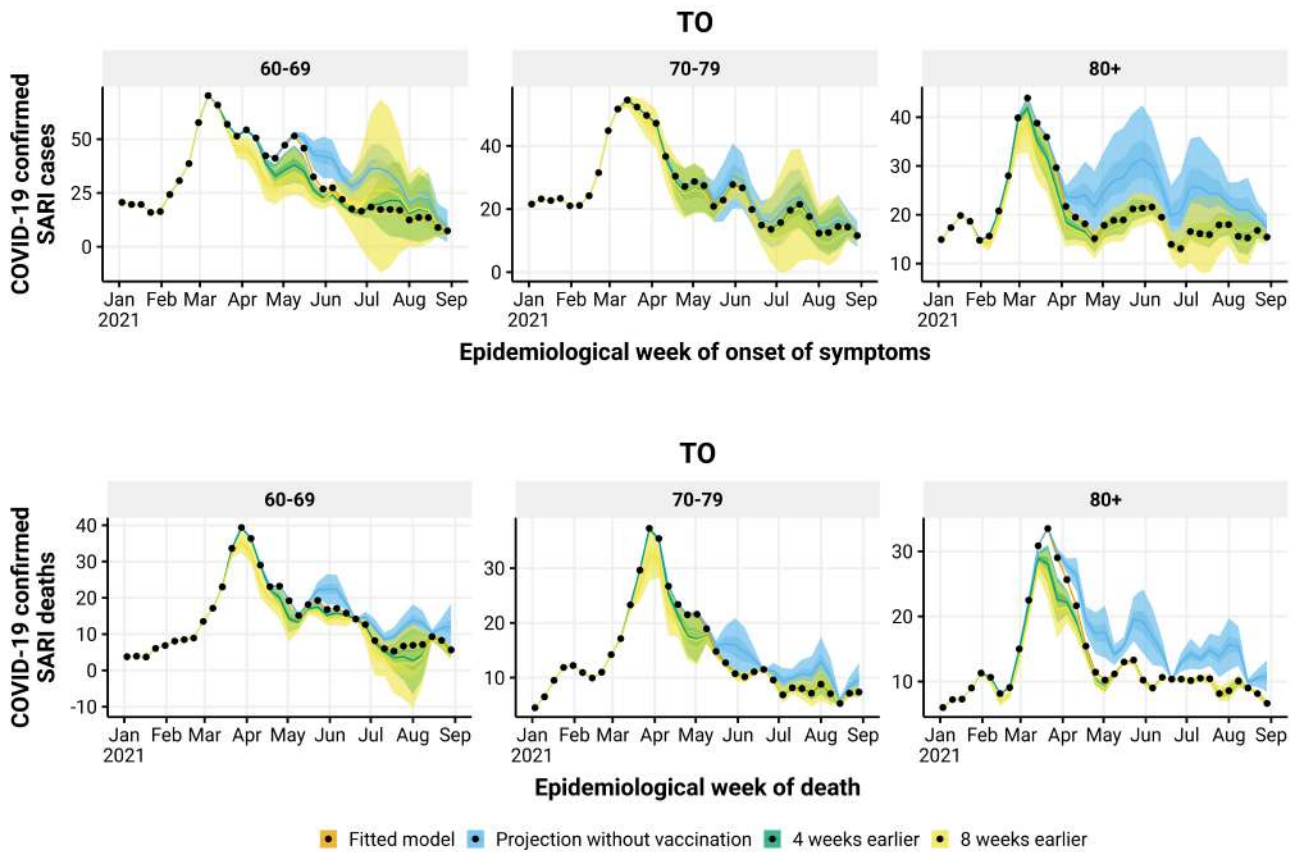

**Figure 15:** Estimated number of hospitalizations (top) and deaths (bottom) by epidemiological week with the realized (orange), no vaccination (blue), 4 (green) and 8 (yellow) weeks earlier vaccination rollout, by age group (panels), in TO state. The observed number of hospitalizations and deaths are given by the black points.

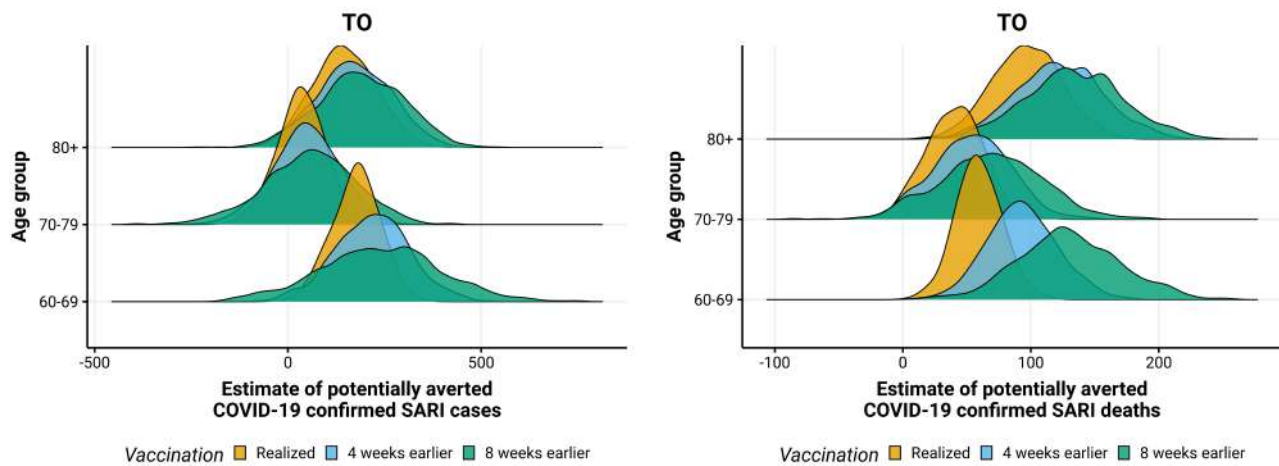

**Figure 16:** Posterior distribution of hospitalizations (left) and deaths (right) potentially averted by vaccination between 2021-01-01 and 2021-08-29 by age group, with the realized (orange), 4 (blue) and 8 weeks earlier (green) vaccination rollout in TO state.

## 1.2 Northeast Region

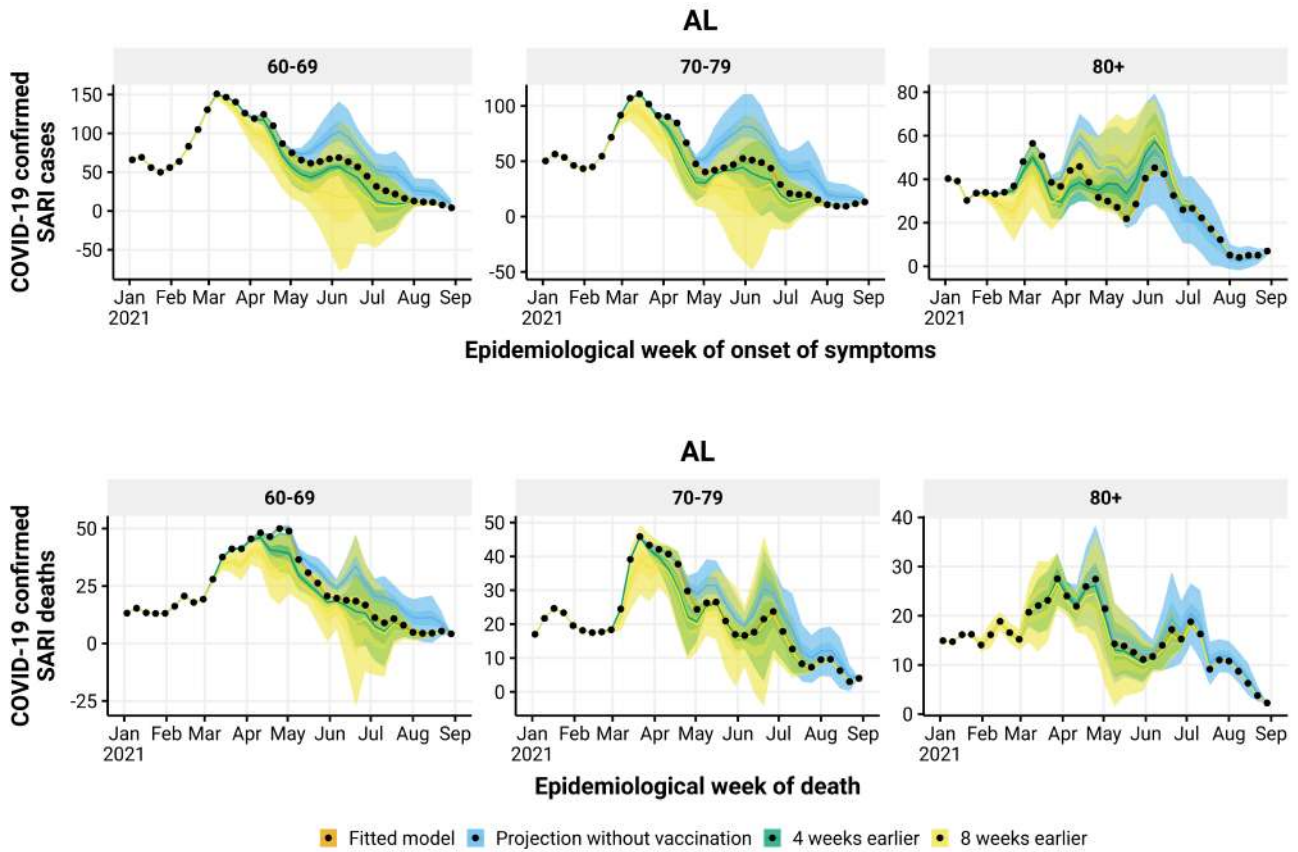

**Figure 17:** Estimated number of hospitalizations (top) and deaths (bottom) by epidemiological week with the realized (orange), no vaccination (blue), 4 (green) and 8 (yellow) weeks earlier vaccination rollout, by age group (panels), in AL state. The observed number of hospitalizations and deaths are given by the black points.

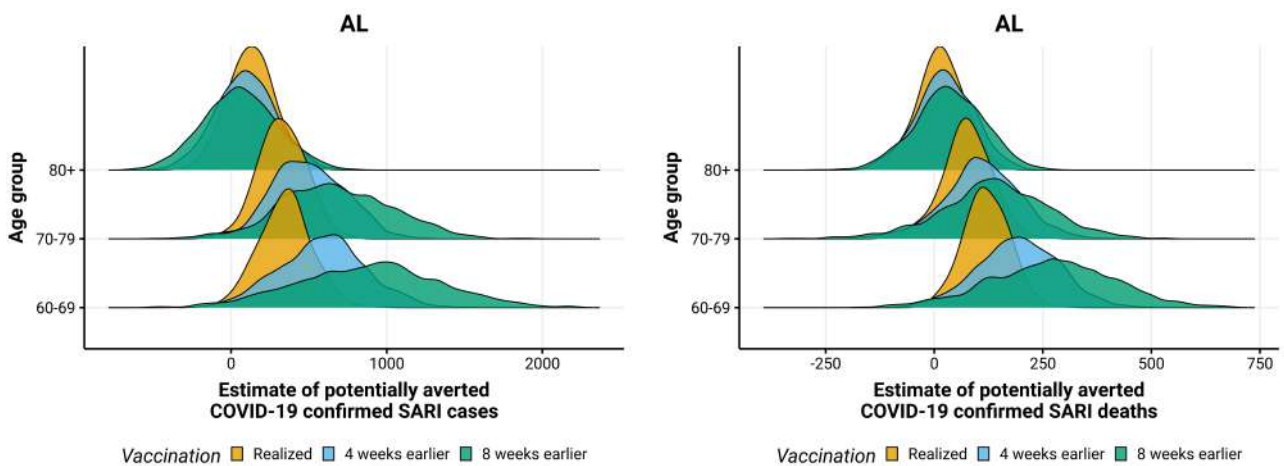

**Figure 18:** Posterior distribution of hospitalizations (left) and deaths (right) potentially averted by vaccination between 2021-01-01 and 2021-08-29 by age group, with the realized (orange), 4 (blue) and 8 weeks earlier (green) vaccination rollout in AL state.

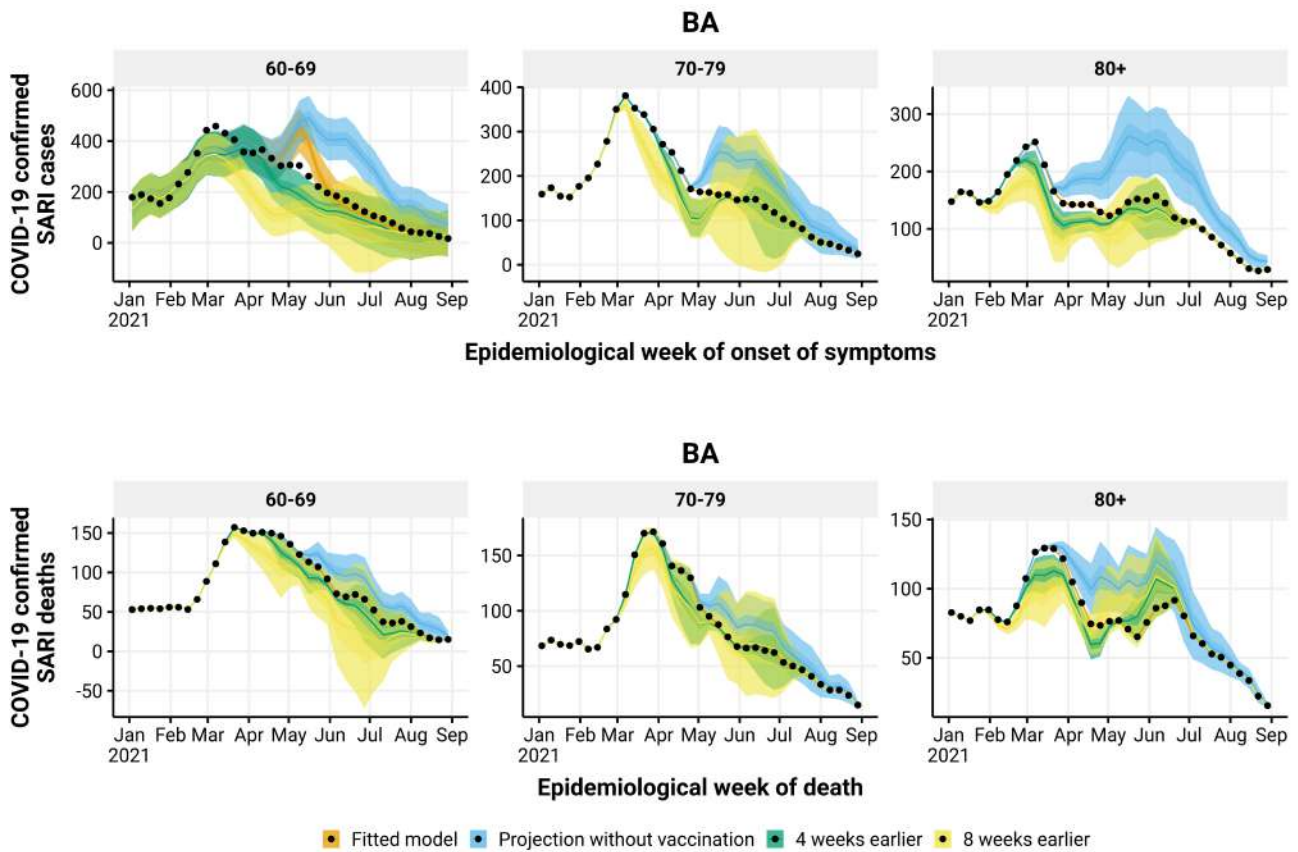

**Figure 19:** Estimated number of hospitalizations (top) and deaths (bottom) by epidemiological week with the realized (orange), no vaccination (blue), 4 (green) and 8 (yellow) weeks earlier vaccination rollout, by age group (panels), in BA state. The observed number of hospitalizations and deaths are given by the black points.

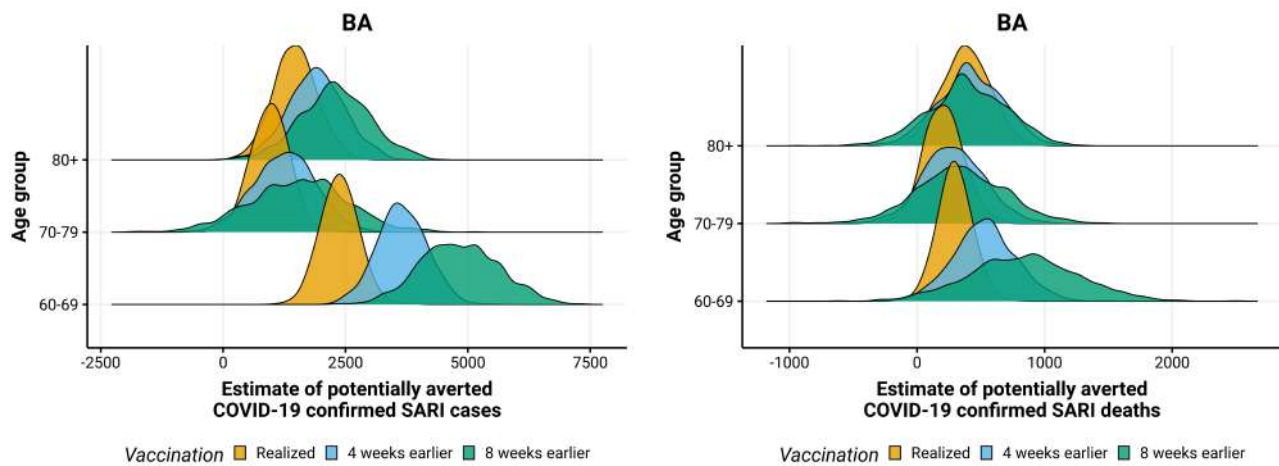

**Figure 20:** Posterior distribution of hospitalizations (left) and deaths (right) potentially averted by vaccination between 2021-01-01 and 2021-08-29 by age group, with the realized (orange), 4 (blue) and 8 weeks earlier (green) vaccination rollout in BA state.

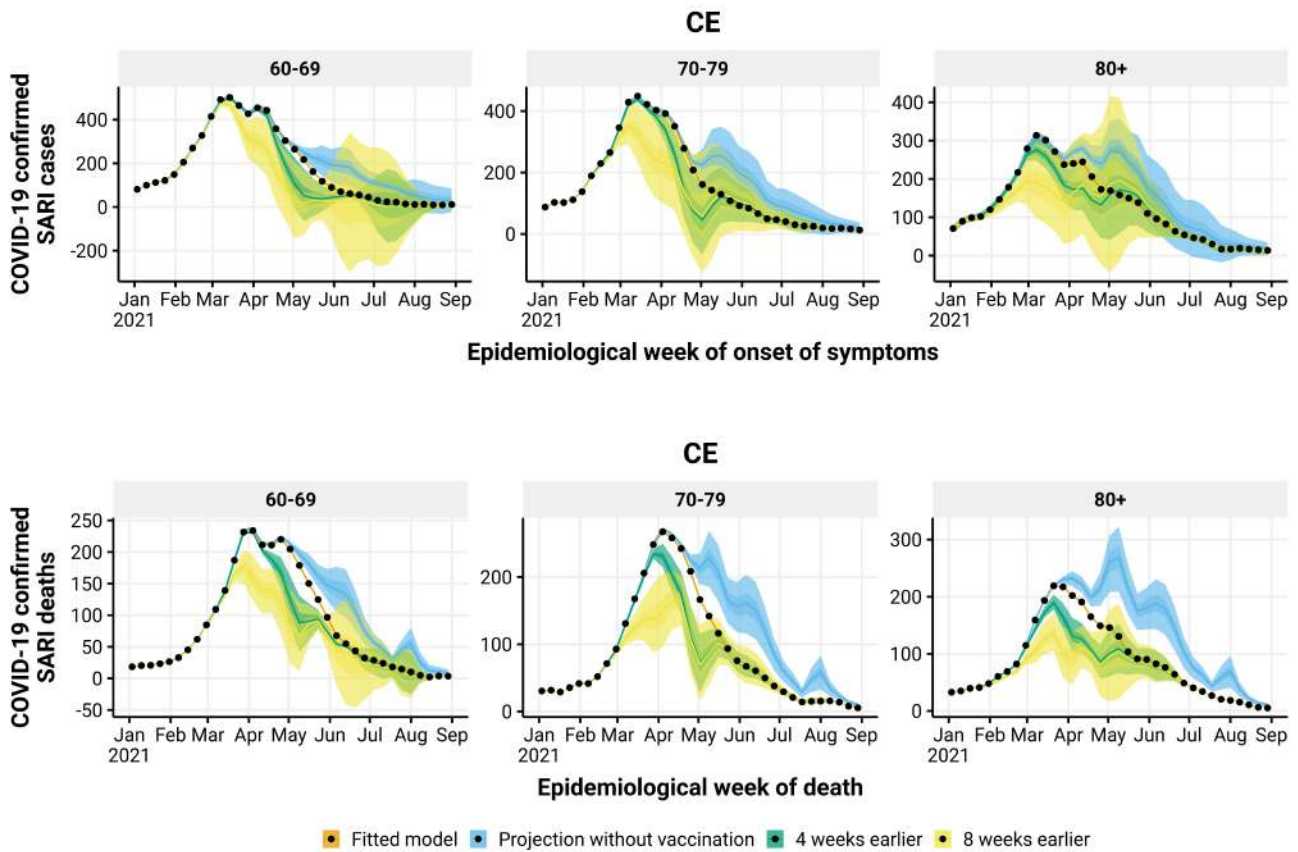

**Figure 21:** Estimated number of hospitalizations (top) and deaths (bottom) by epidemiological week with the realized (orange), no vaccination (blue), 4 (green) and 8 (yellow) weeks earlier vaccination rollout, by age group (panels), in CE state. The observed number of hospitalizations and deaths are given by the black points.

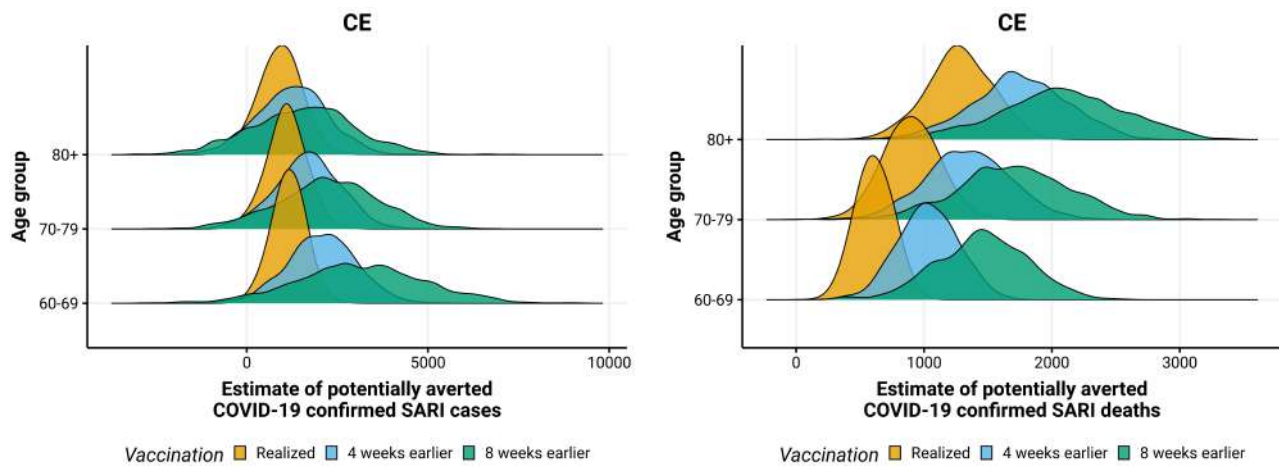

**Figure 22:** Posterior distribution of hospitalizations (left) and deaths (right) potentially averted by vaccination between 2021-01-01 and 2021-08-29 by age group, with the realized (orange), 4 (blue) and 8 weeks earlier (green) vaccination rollout in CE state.

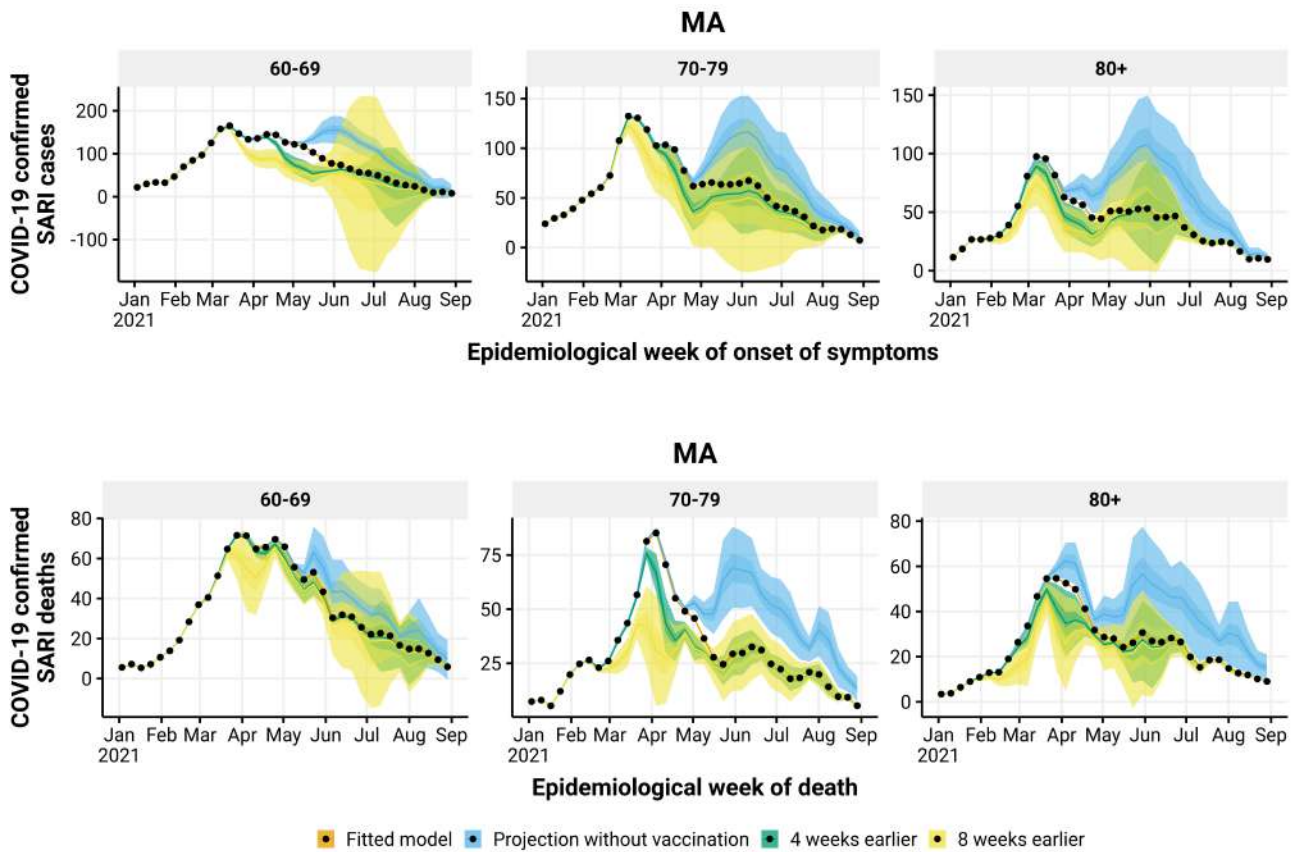

**Figure 23:** Estimated number of hospitalizations (top) and deaths (bottom) by epidemiological week with the realized (orange), no vaccination (blue), 4 (green) and 8 (yellow) weeks earlier vaccination rollout, by age group (panels), in MA state. The observed number of hospitalizations and deaths are given by the black points.

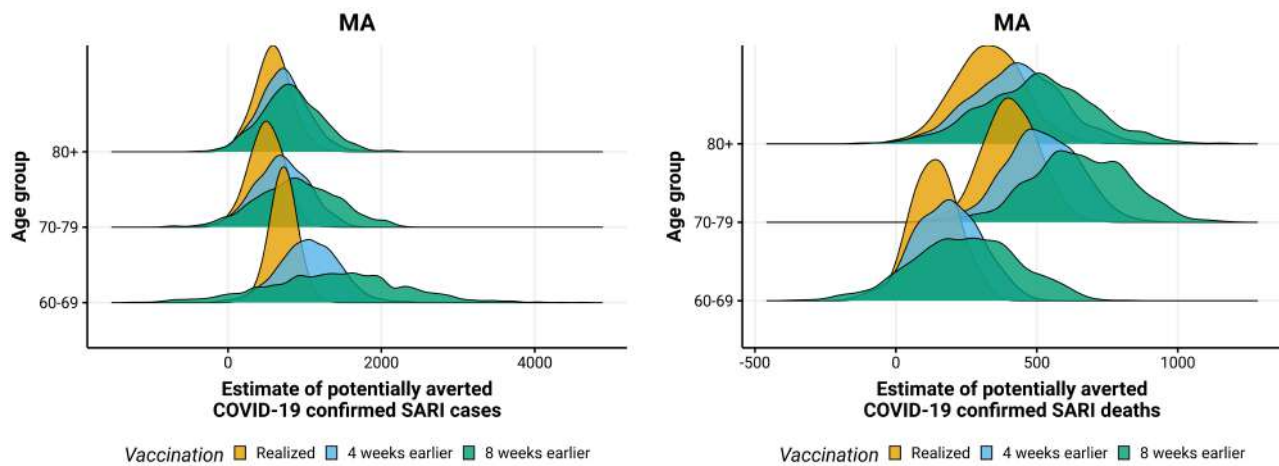

**Figure 24:** Posterior distribution of hospitalizations (left) and deaths (right) potentially averted by vaccination between 2021-01-01 and 2021-08-29 by age group, with the realized (orange), 4 (blue) and 8 weeks earlier (green) vaccination rollout in MA state.



**Figure 25:** Estimated number of hospitalizations (top) and deaths (bottom) by epidemiological week with the realized (orange), no vaccination (blue), 4 (green) and 8 (yellow) weeks earlier vaccination rollout, by age group (panels), in PA state. The observed number of hospitalizations and deaths are given by the black points.



**Figure 26:** Posterior distribution of hospitalizations (left) and deaths (right) potentially averted by vaccination between 2021-01-01 and 2021-08-29 by age group, with the realized (orange), 4 (blue) and 8 weeks earlier (green) vaccination rollout in PA state.

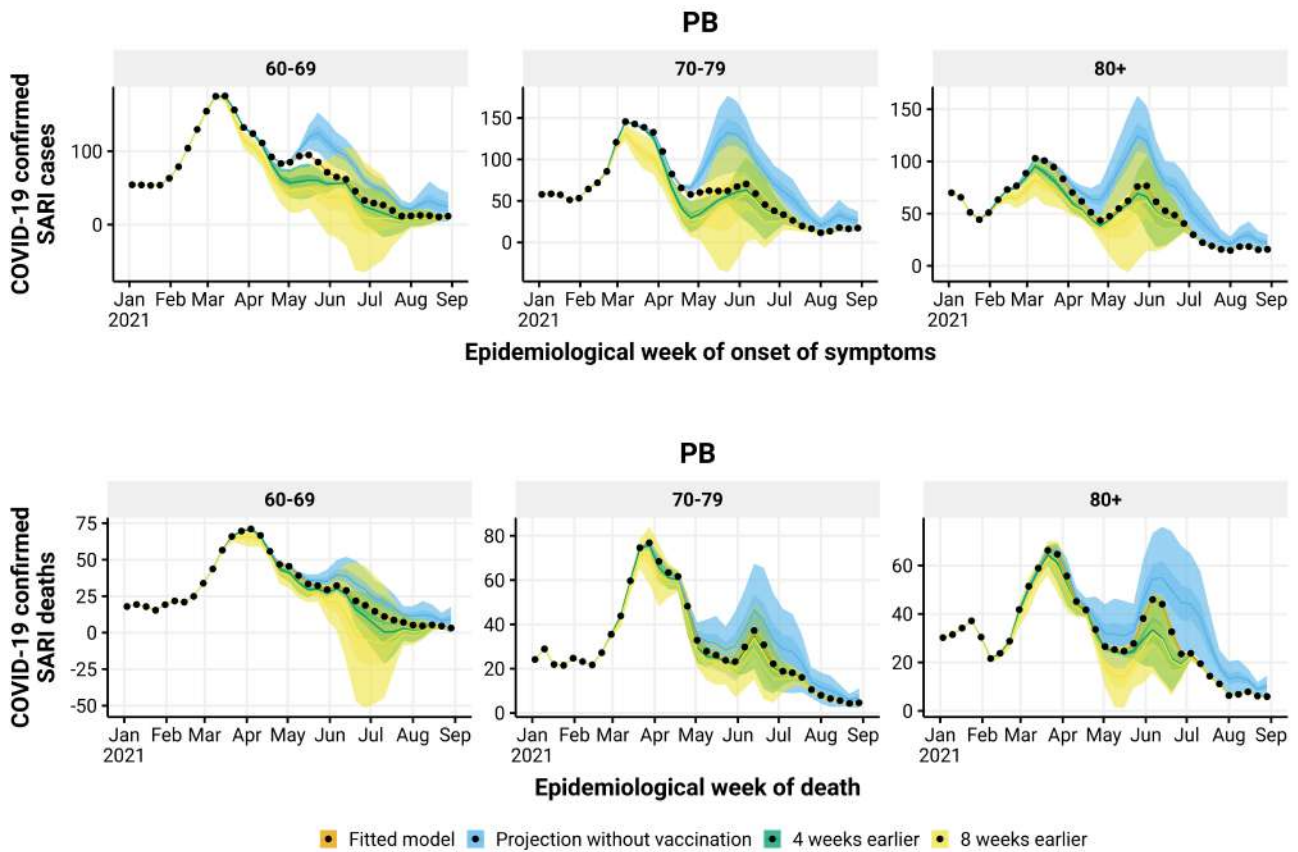

**Figure 27:** Estimated number of hospitalizations (top) and deaths (bottom) by epidemiological week with the realized (orange), no vaccination (blue), 4 (green) and 8 (yellow) weeks earlier vaccination rollout, by age group (panels), in PB state. The observed number of hospitalizations and deaths are given by the black points.

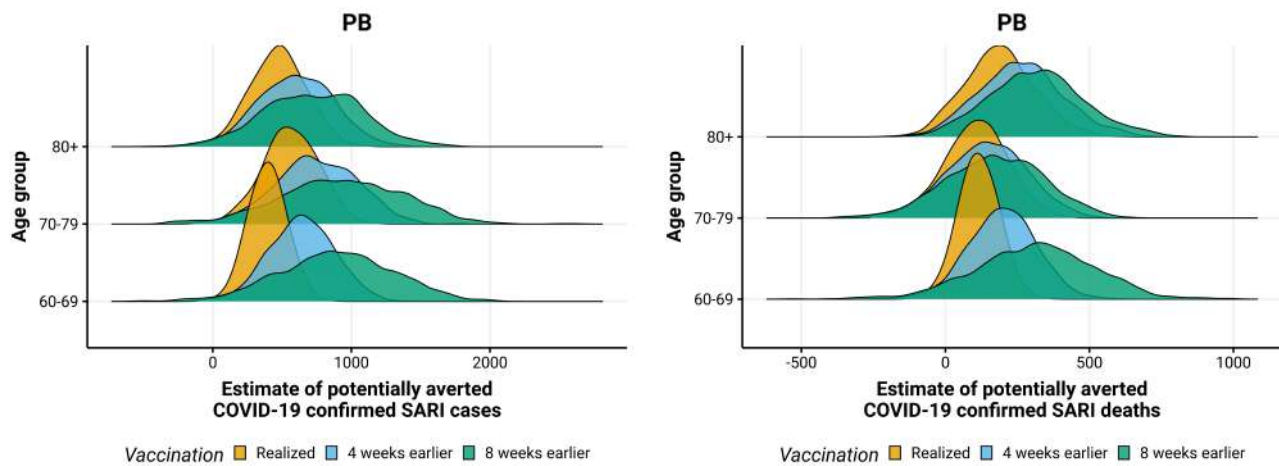

**Figure 28:** Posterior distribution of hospitalizations (left) and deaths (right) potentially averted by vaccination between 2021-01-01 and 2021-08-29 by age group, with the realized (orange), 4 (blue) and 8 weeks earlier (green) vaccination rollout in PB state.



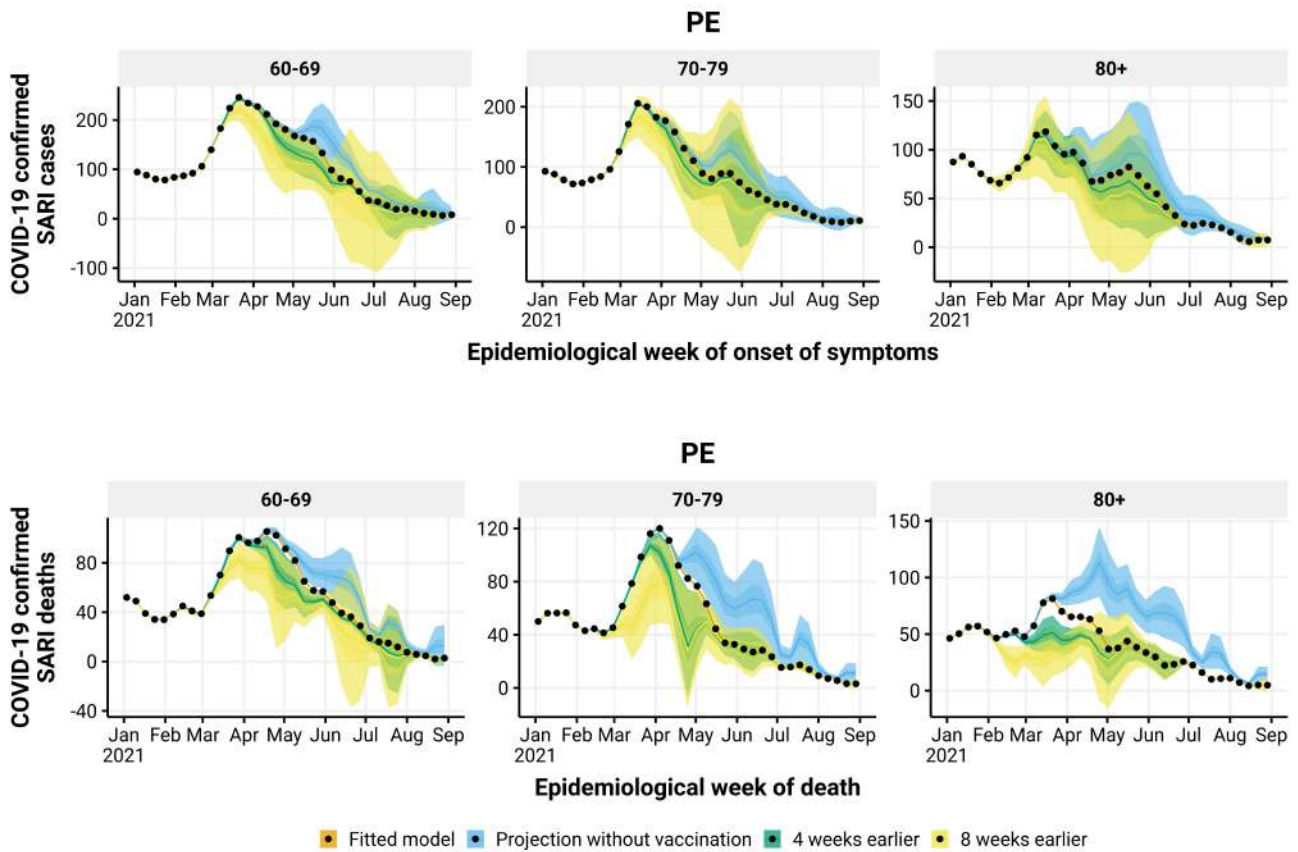

**Figure 29:** Estimated number of hospitalizations (top) and deaths (bottom) by epidemiological week with the realized (orange), no vaccination (blue), 4 (green) and 8 (yellow) weeks earlier vaccination rollout, by age group (panels), in PE state. The observed number of hospitalizations and deaths are given by the black points.

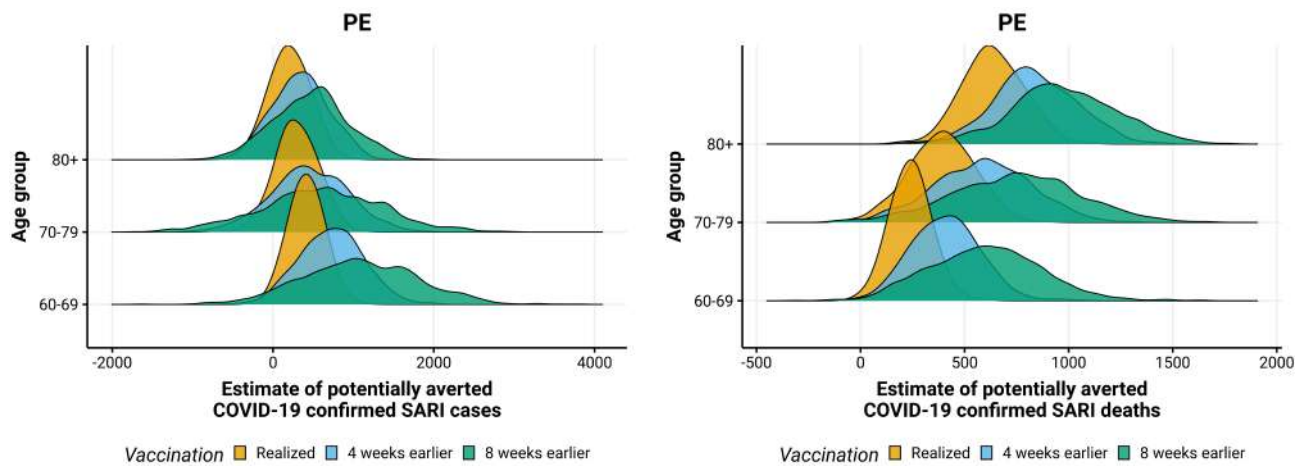

**Figure 30:** Posterior distribution of hospitalizations (left) and deaths (right) potentially averted by vaccination between 2021-01-01 and 2021-08-29 by age group, with the realized (orange), 4 (blue) and 8 weeks earlier (green) vaccination rollout in PE state.

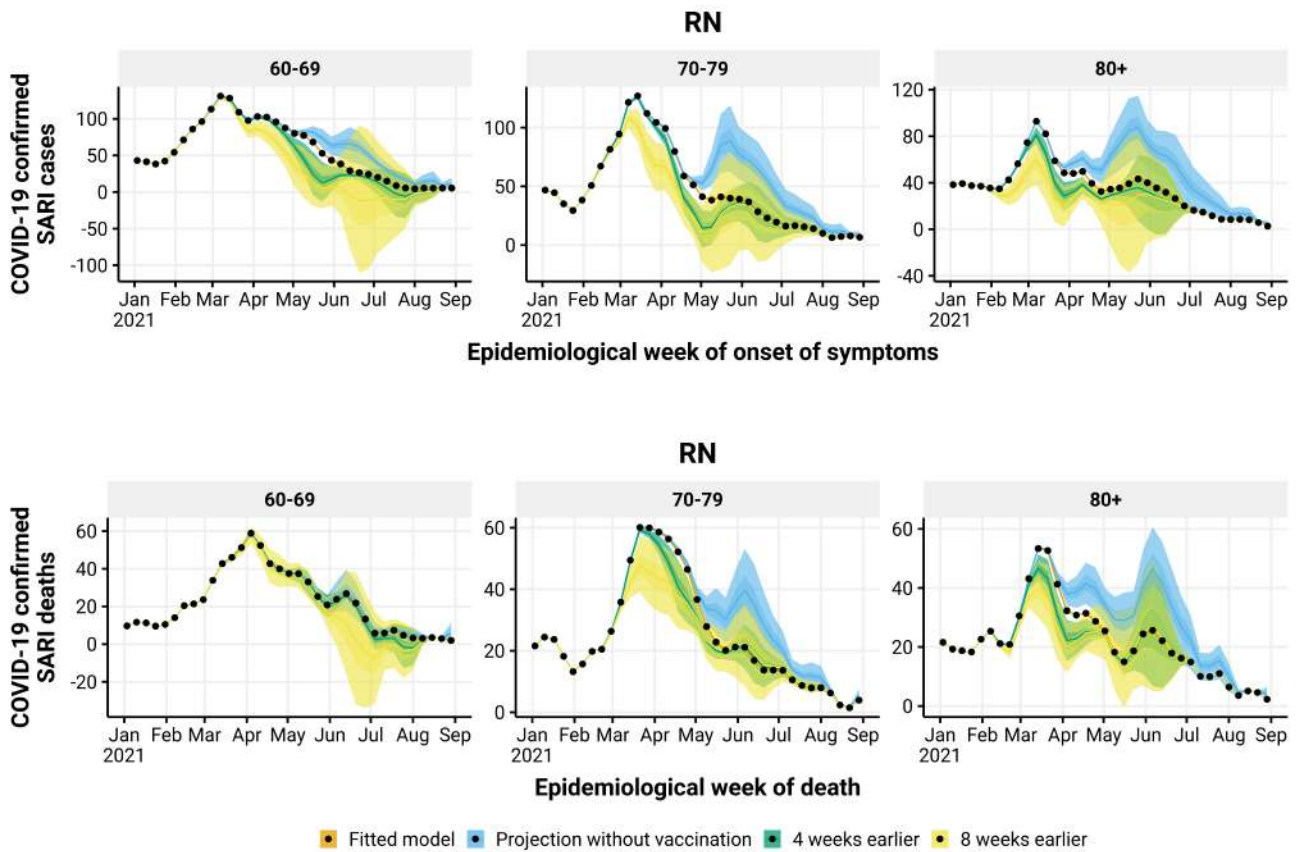

**Figure 31:** Estimated number of hospitalizations (top) and deaths (bottom) by epidemiological week with the realized (orange), no vaccination (blue), 4 (green) and 8 (yellow) weeks earlier vaccination rollout, by age group (panels), in RN state. The observed number of hospitalizations and deaths are given by the black points.

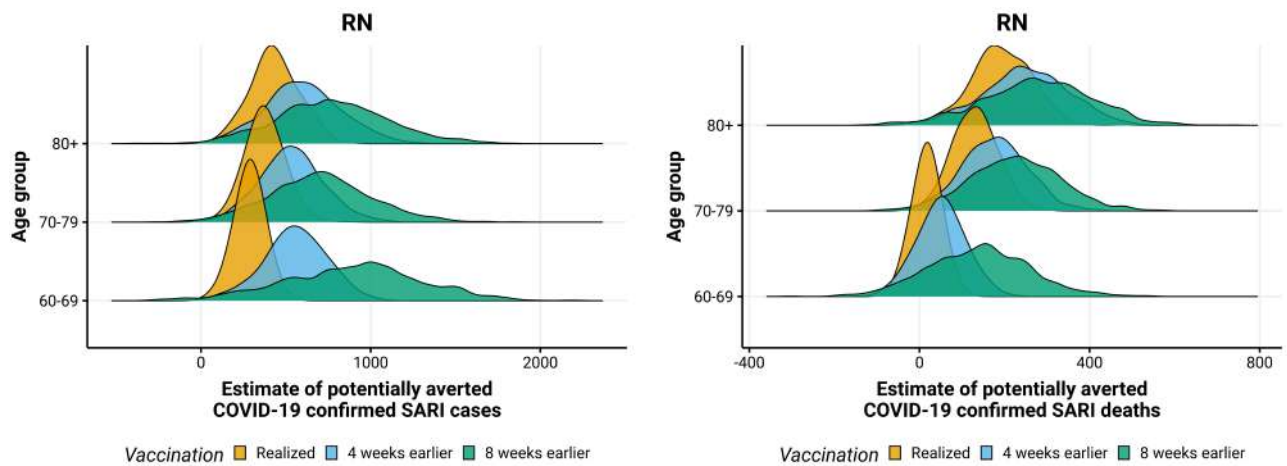

**Figure 32:** Posterior distribution of hospitalizations (left) and deaths (right) potentially averted by vaccination between 2021-01-01 and 2021-08-29 by age group, with the realized (orange), 4 (blue) and 8 weeks earlier (green) vaccination rollout in RN state.

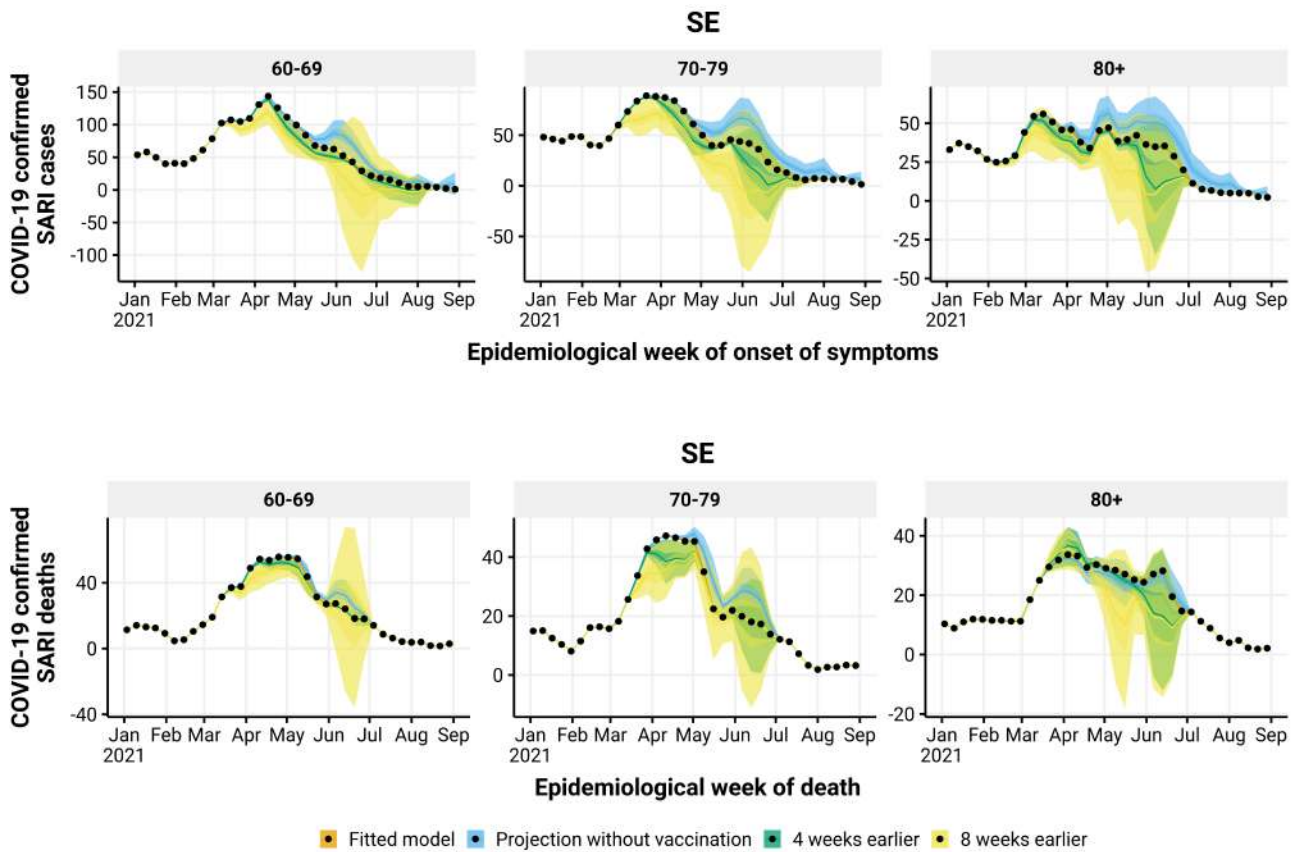

**Figure 33:** Estimated number of hospitalizations (top) and deaths (bottom) by epidemiological week with the realized (orange), no vaccination (blue), 4 (green) and 8 (yellow) weeks earlier vaccination rollout, by age group (panels), in SE state. The observed number of hospitalizations and deaths are given by the black points.

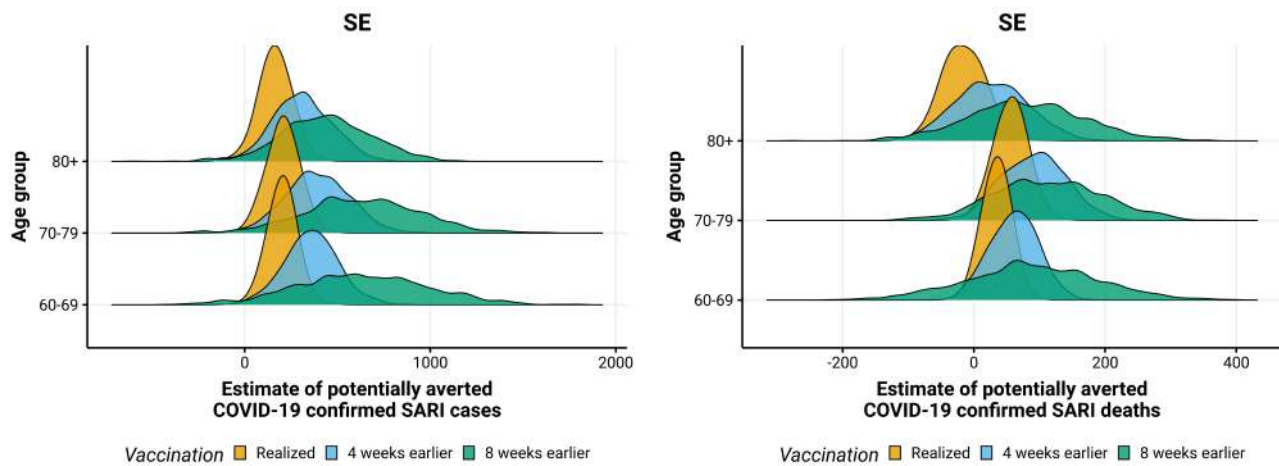

**Figure 34:** Posterior distribution of hospitalizations (left) and deaths (right) potentially averted by vaccination between 2021-01-01 and 2021-08-29 by age group, with the realized (orange), 4 (blue) and 8 weeks earlier (green) vaccination rollout in SE state.

### 1.3 Southeast Region

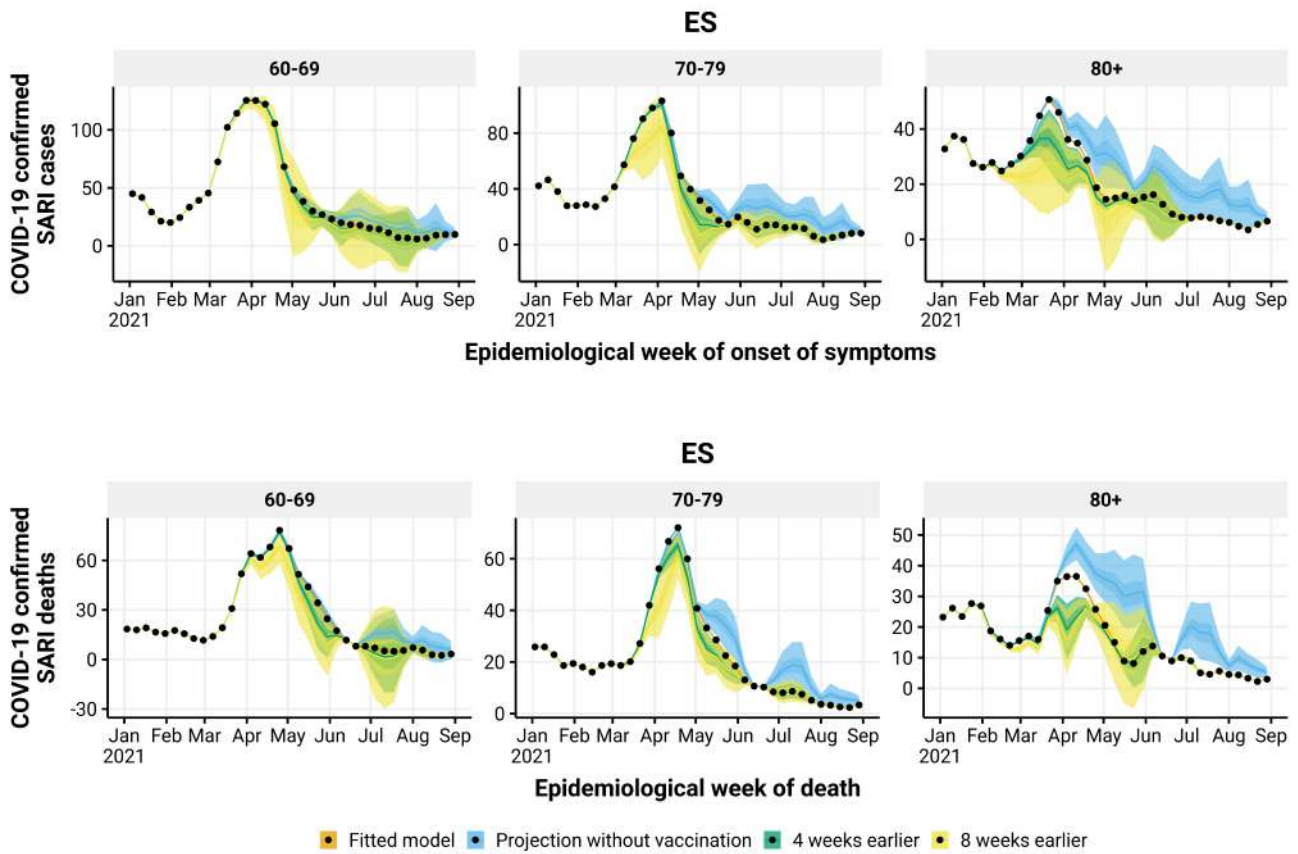

**Figure 35:** Estimated number of hospitalizations (top) and deaths (bottom) by epidemiological week with the realized (orange), no vaccination (blue), 4 (green) and 8 (yellow) weeks earlier vaccination rollout, by age group (panels), in ES state. The observed number of hospitalizations and deaths are given by the black points.

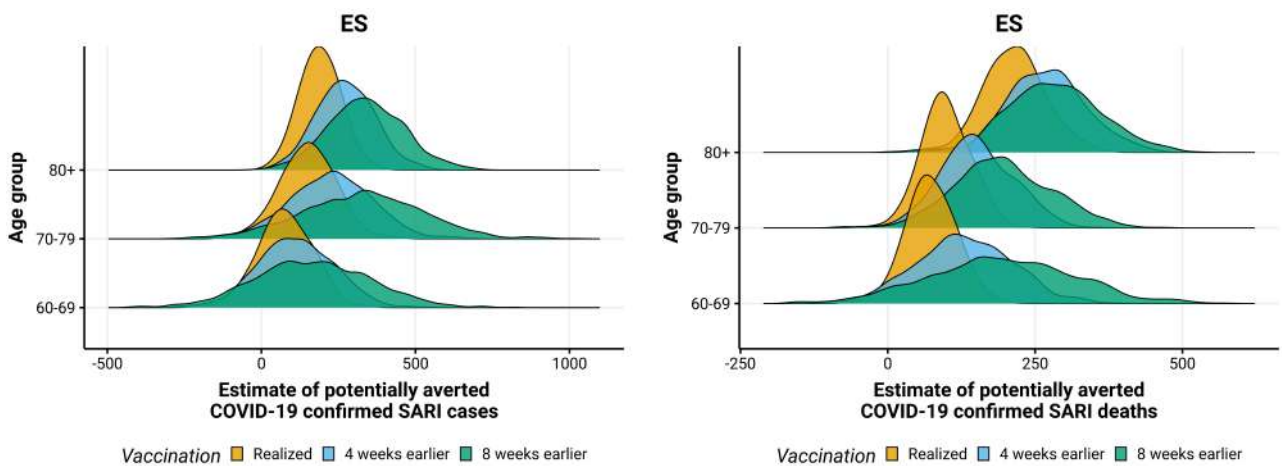

**Figure 36:** Posterior distribution of hospitalizations (left) and deaths (right) potentially averted by vaccination between 2021-01-01 and 2021-08-29 by age group, with the realized (orange), 4 (blue) and 8 weeks earlier (green) vaccination rollout in ES state.

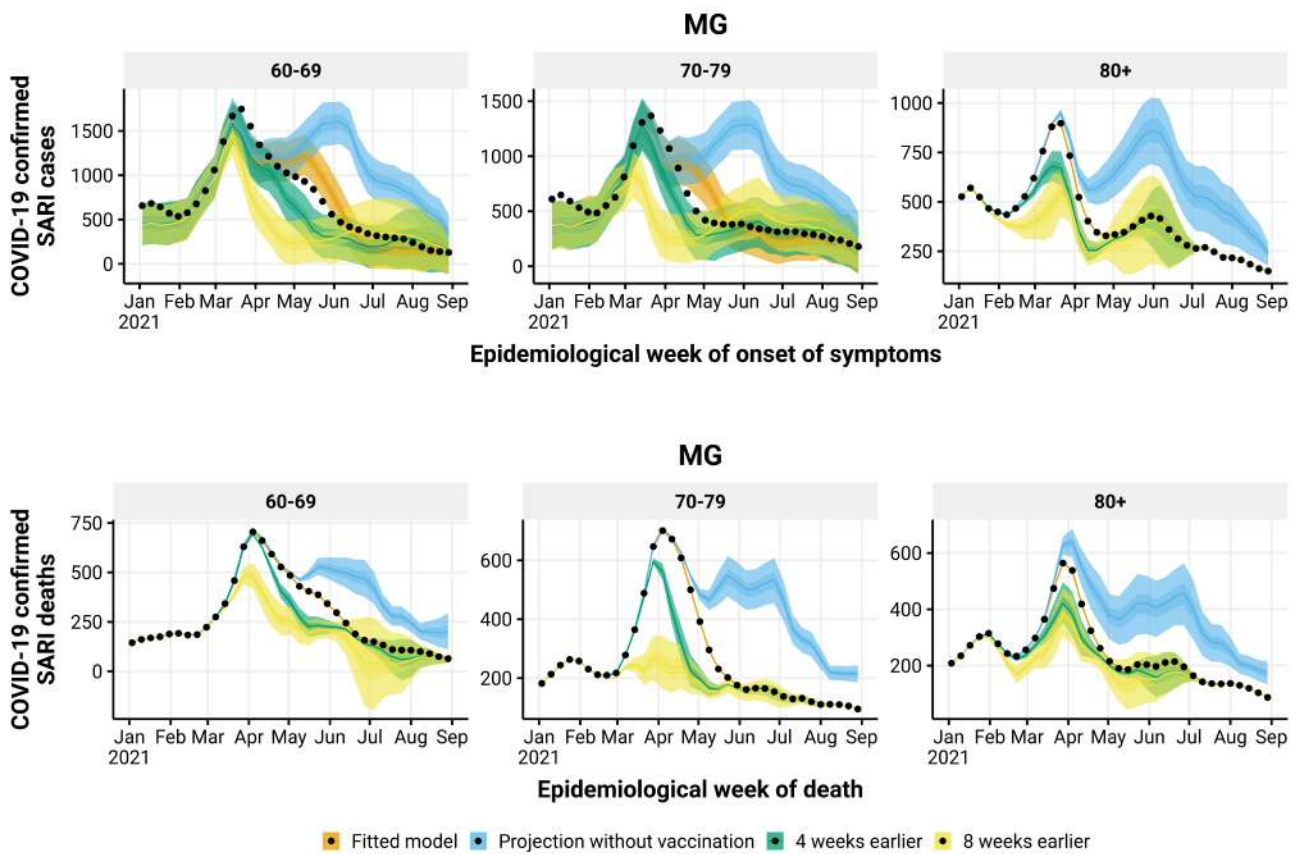

**Figure 37:** Estimated number of hospitalizations (top) and deaths (bottom) by epidemiological week with the realized (orange), no vaccination (blue), 4 (green) and 8 (yellow) weeks earlier vaccination rollout, by age group (panels), in MG state. The observed number of hospitalizations and deaths are given by the black points.

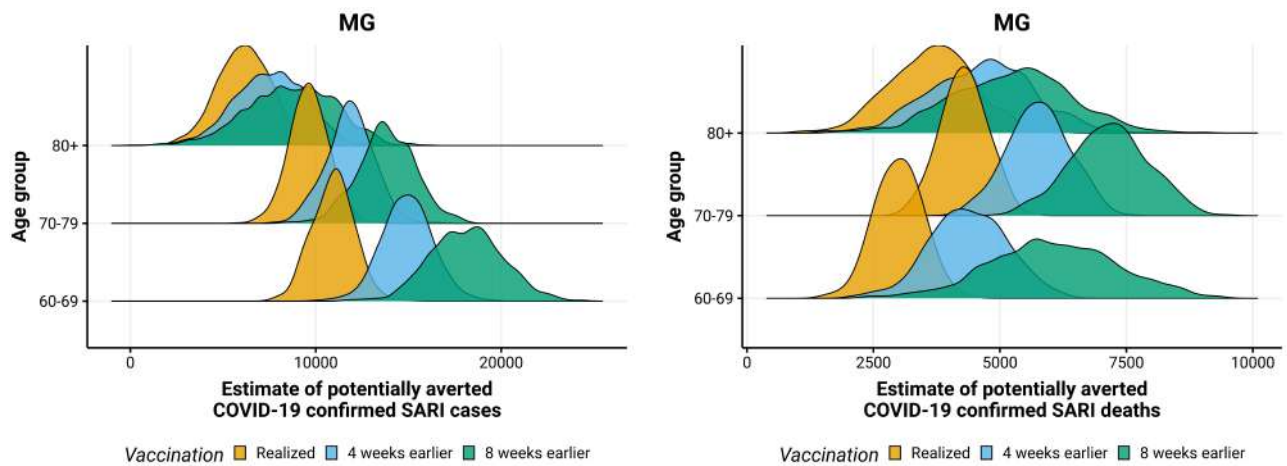

**Figure 38:** Posterior distribution of hospitalizations (left) and deaths (right) potentially averted by vaccination between 2021-01-01 and 2021-08-29 by age group, with the realized (orange), 4 (blue) and 8 weeks earlier (green) vaccination rollout in MG state.

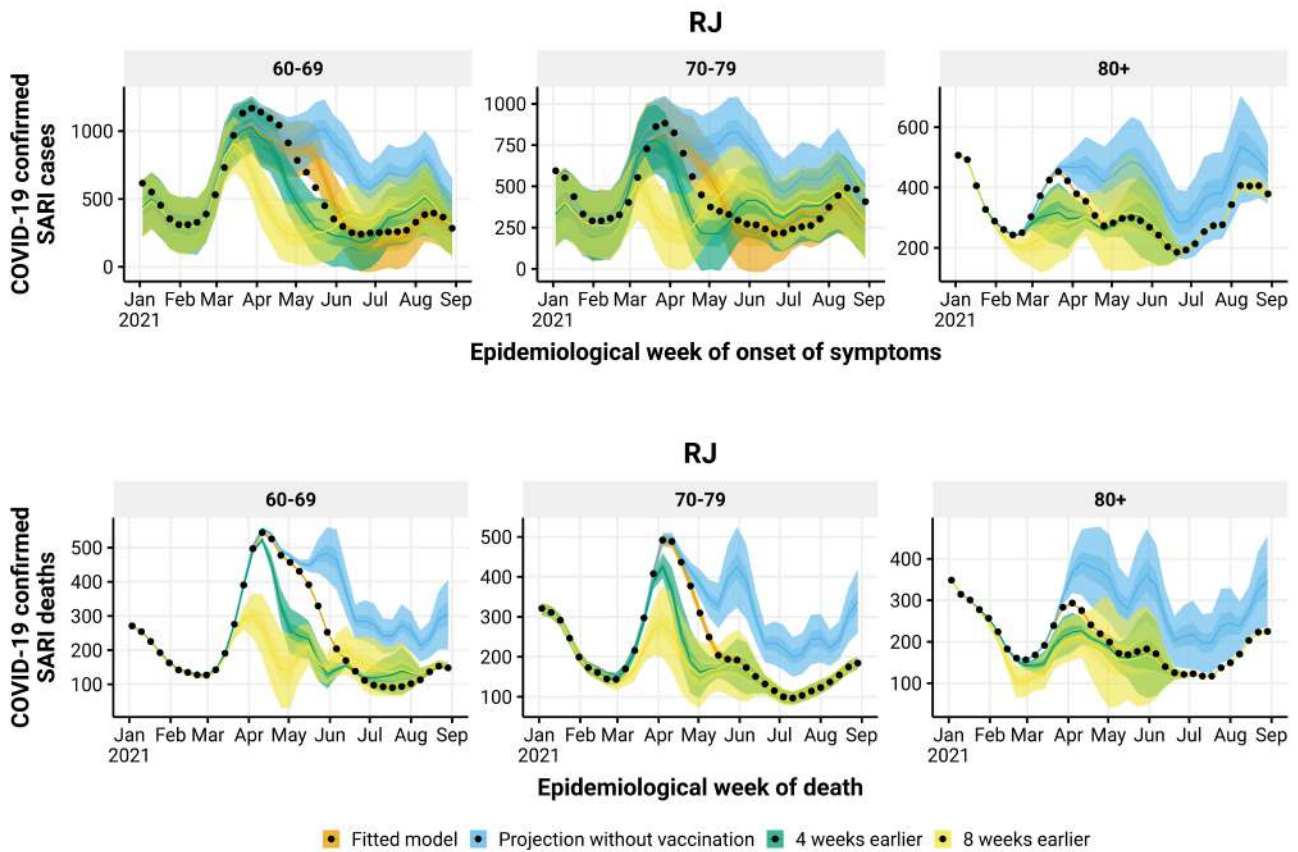

**Figure 39:** Estimated number of hospitalizations (top) and deaths (bottom) by epidemiological week with the realized (orange), no vaccination (blue), 4 (green) and 8 (yellow) weeks earlier vaccination rollout, by age group (panels), in RJ state. The observed number of hospitalizations and deaths are given by the black points.

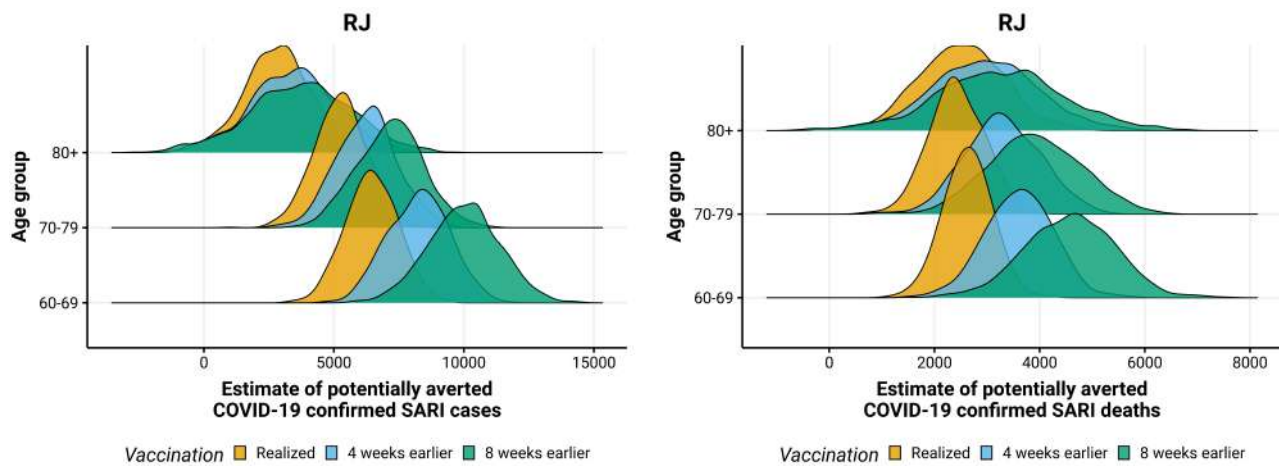

**Figure 40:** Posterior distribution of hospitalizations (left) and deaths (right) potentially averted by vaccination between 2021-01-01 and 2021-08-29 by age group, with the realized (orange), 4 (blue) and 8 weeks earlier (green) vaccination rollout in RJ state.

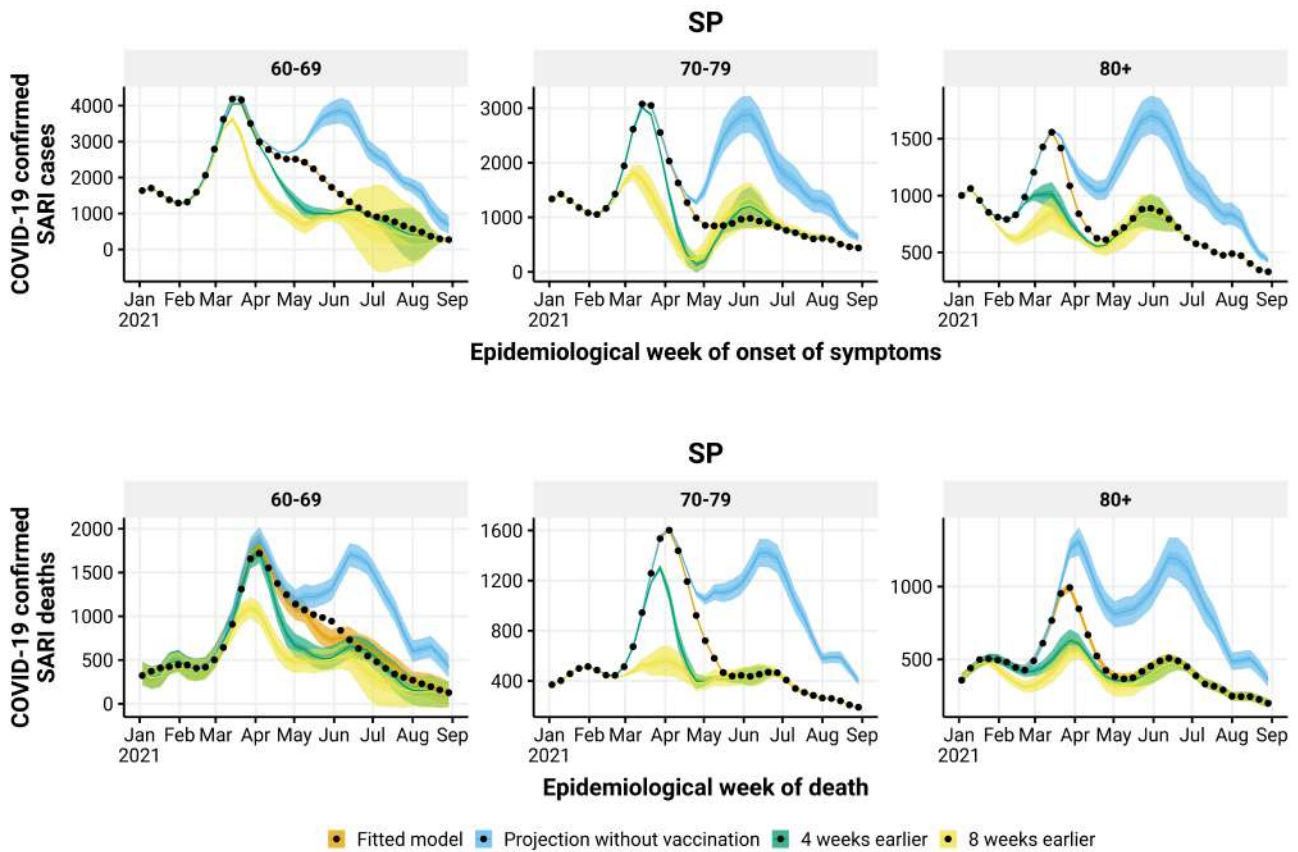

**Figure 41:** Estimated number of hospitalizations (top) and deaths (bottom) by epidemiological week with the realized (orange), no vaccination (blue), 4 (green) and 8 (yellow) weeks earlier vaccination rollout, by age group (panels), in SP state. The observed number of hospitalizations and deaths are given by the black points.

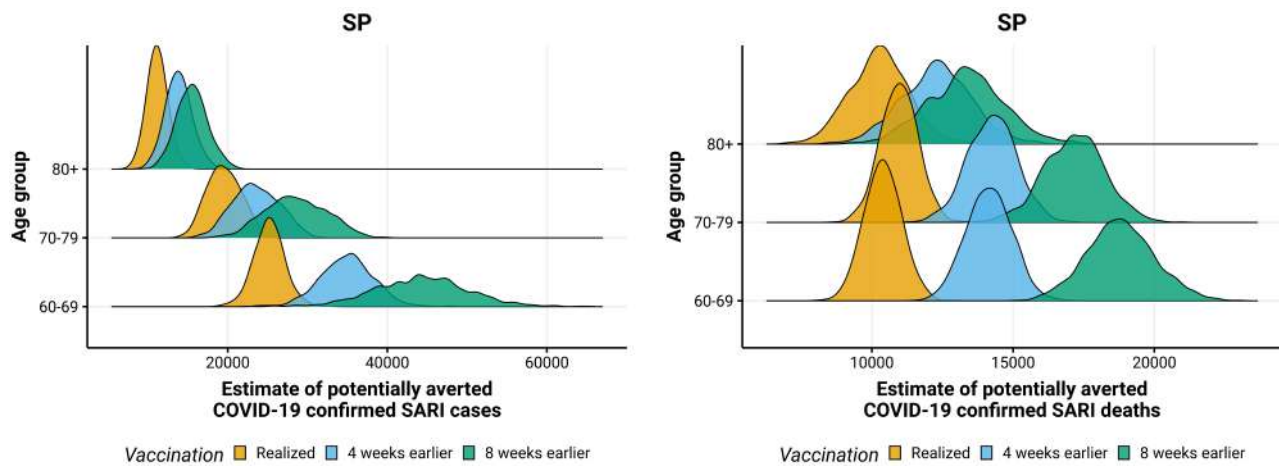

**Figure 42:** Posterior distribution of hospitalizations (left) and deaths (right) potentially averted by vaccination between 2021-01-01 and 2021-08-29 by age group, with the realized (orange), 4 (blue) and 8 weeks earlier (green) vaccination rollout in SP state.

## 1.4 South Region

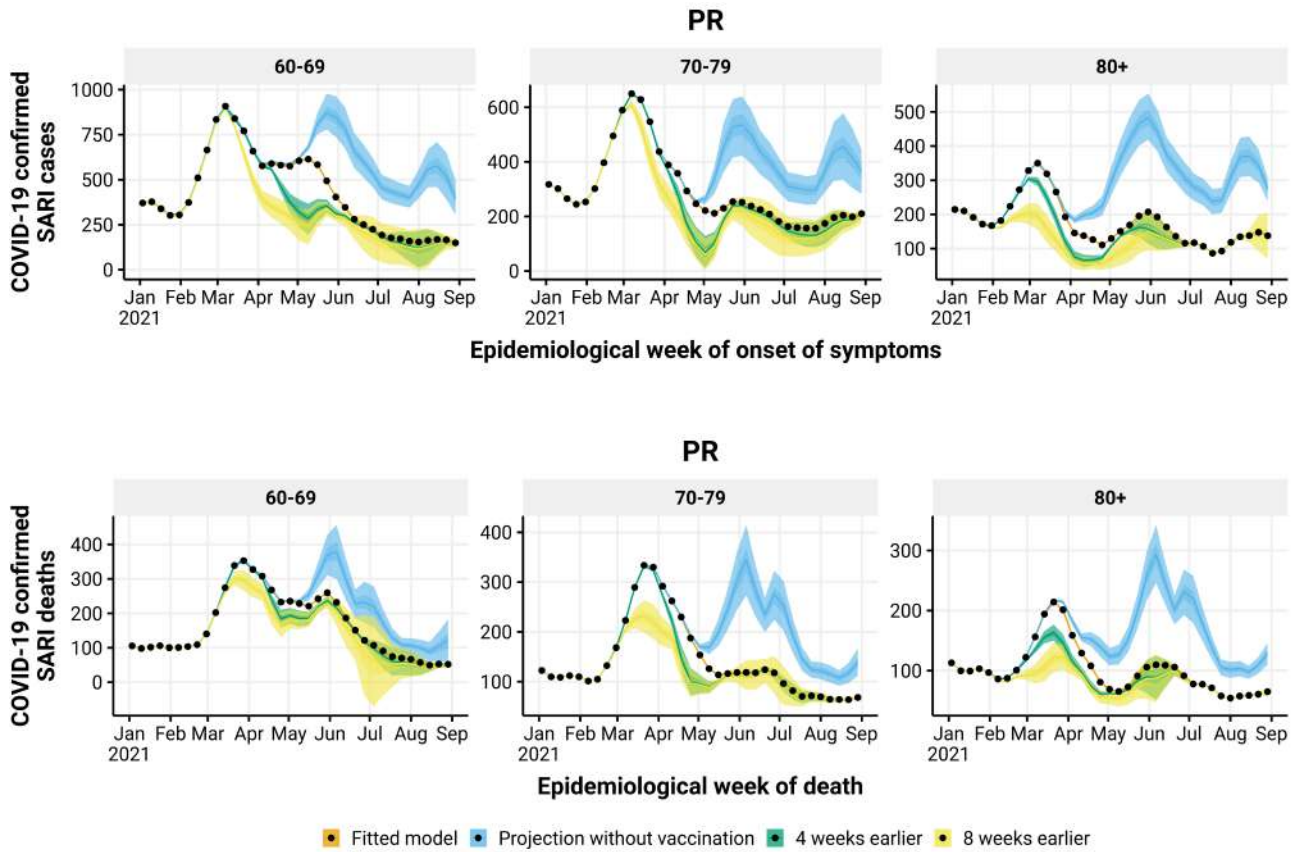

**Figure 43:** Estimated number of hospitalizations (top) and deaths (bottom) by epidemiological week with the realized (orange), no vaccination (blue), 4 (green) and 8 (yellow) weeks earlier vaccination rollout, by age group (panels), in PR state. The observed number of hospitalizations and deaths are given by the black points.

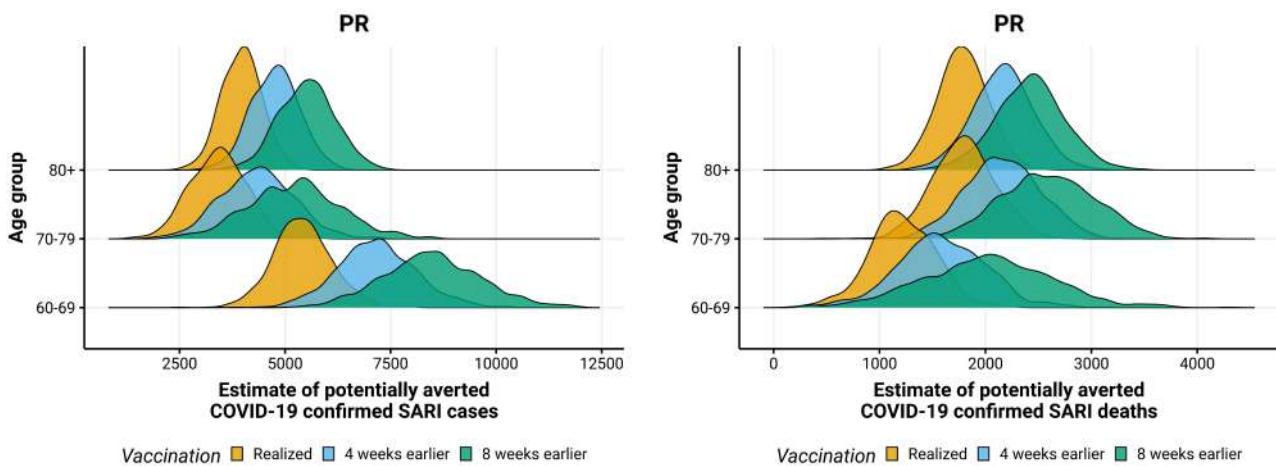

**Figure 44:** Posterior distribution of hospitalizations (left) and deaths (right) potentially averted by vaccination between 2021-01-01 and 2021-08-29 by age group, with the realized (orange), 4 (blue) and 8 weeks earlier (green) vaccination rollout in PR state.



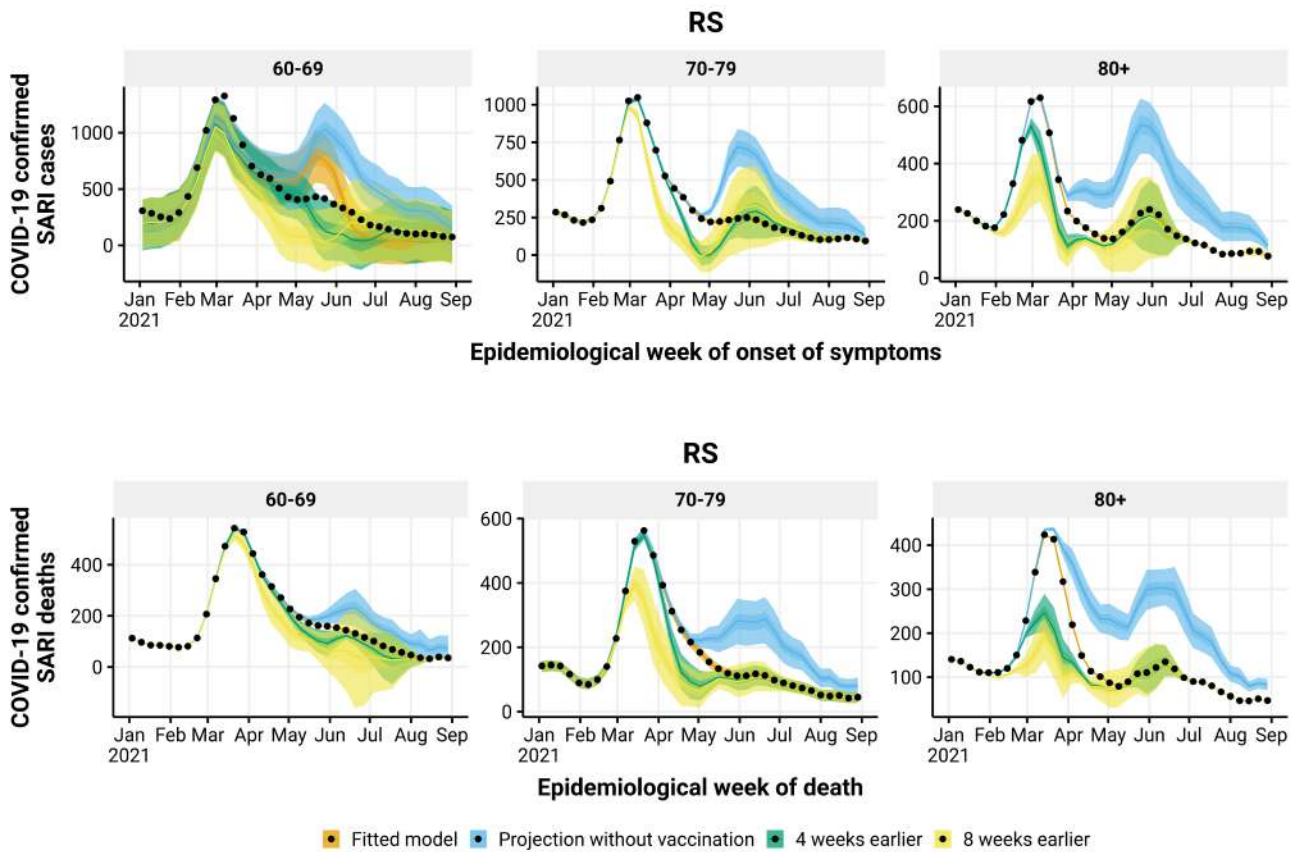

**Figure 45:** Estimated number of hospitalizations (top) and deaths (bottom) by epidemiological week with the realized (orange), no vaccination (blue), 4 (green) and 8 (yellow) weeks earlier vaccination rollout, by age group (panels), in RS state. The observed number of hospitalizations and deaths are given by the black points.

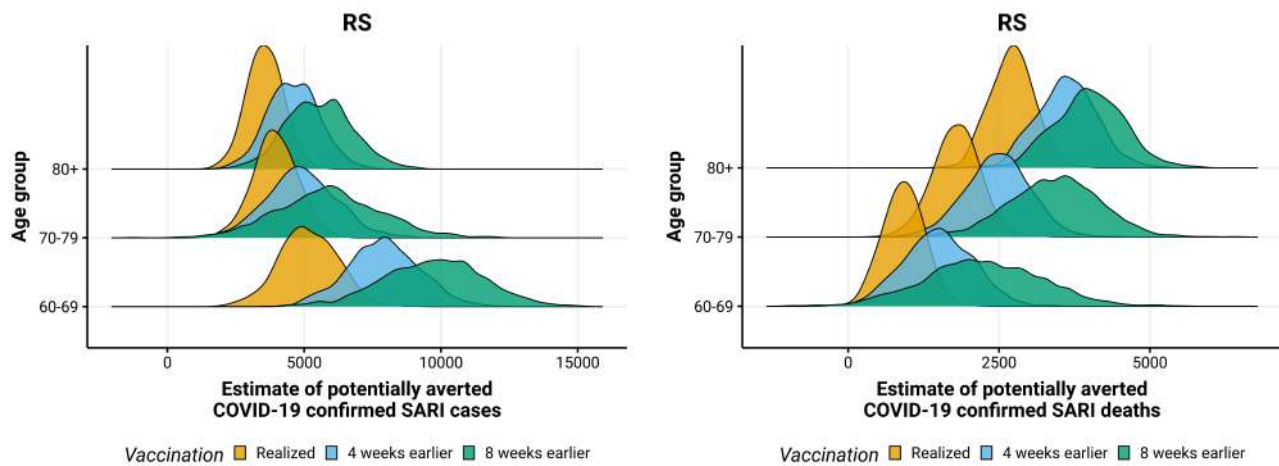

**Figure 46:** Posterior distribution of hospitalizations (left) and deaths (right) potentially averted by vaccination between 2021-01-01 and 2021-08-29 by age group, with the realized (orange), 4 (blue) and 8 weeks earlier (green) vaccination rollout in RS state.

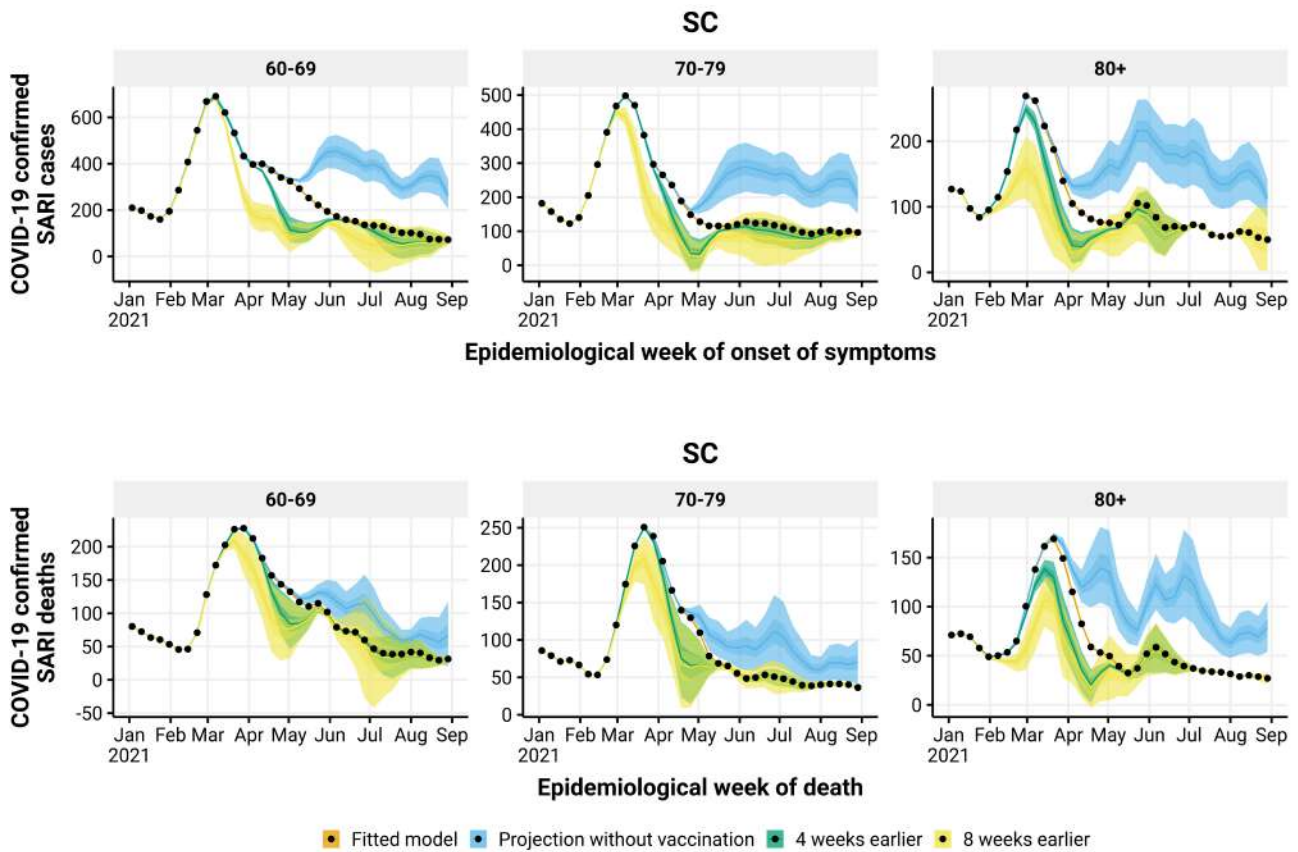

**Figure 47:** Estimated number of hospitalizations (top) and deaths (bottom) by epidemiological week with the realized (orange), no vaccination (blue), 4 (green) and 8 (yellow) weeks earlier vaccination rollout, by age group (panels), in SC state. The observed number of hospitalizations and deaths are given by the black points.

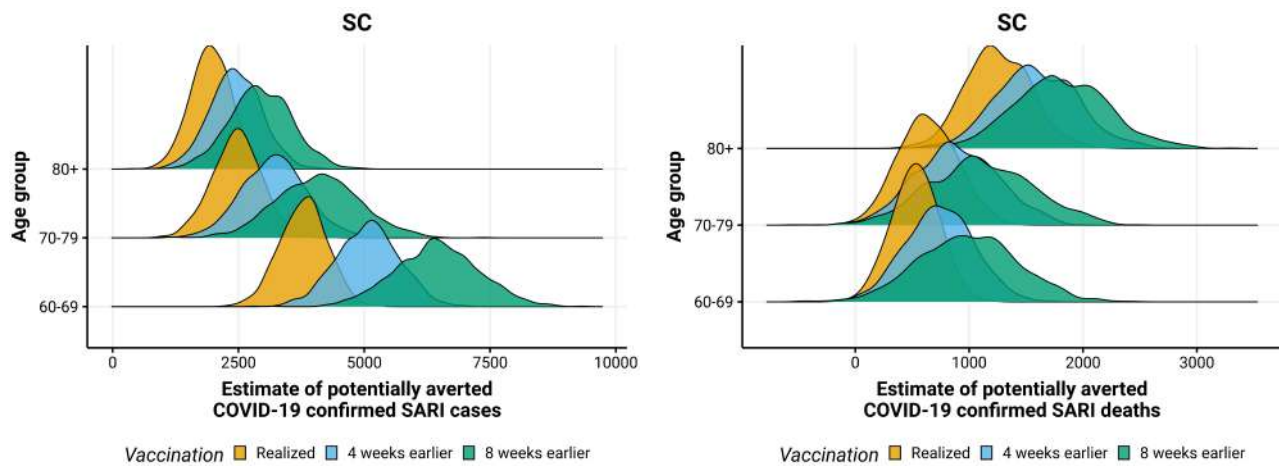

**Figure 48:** Posterior distribution of hospitalizations (left) and deaths (right) potentially averted by vaccination between 2021-01-01 and 2021-08-29 by age group, with the realized (orange), 4 (blue) and 8 weeks earlier (green) vaccination rollout in SC state.

## 1.5 Center-west Region

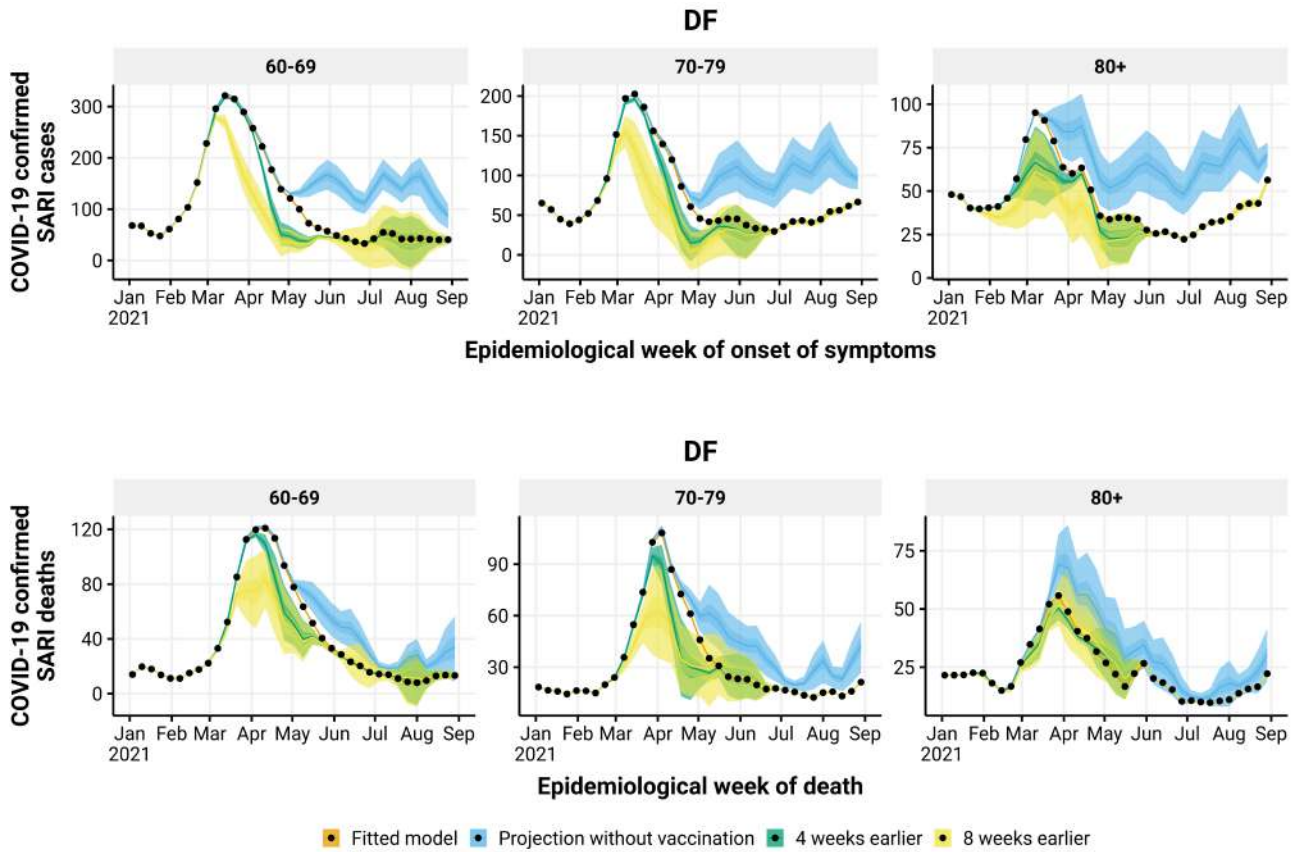

**Figure 49:** Estimated number of hospitalizations (top) and deaths (bottom) by epidemiological week with the realized (orange), no vaccination (blue), 4 (green) and 8 (yellow) weeks earlier vaccination rollout, by age group (panels), in DF state. The observed number of hospitalizations and deaths are given by the black points.

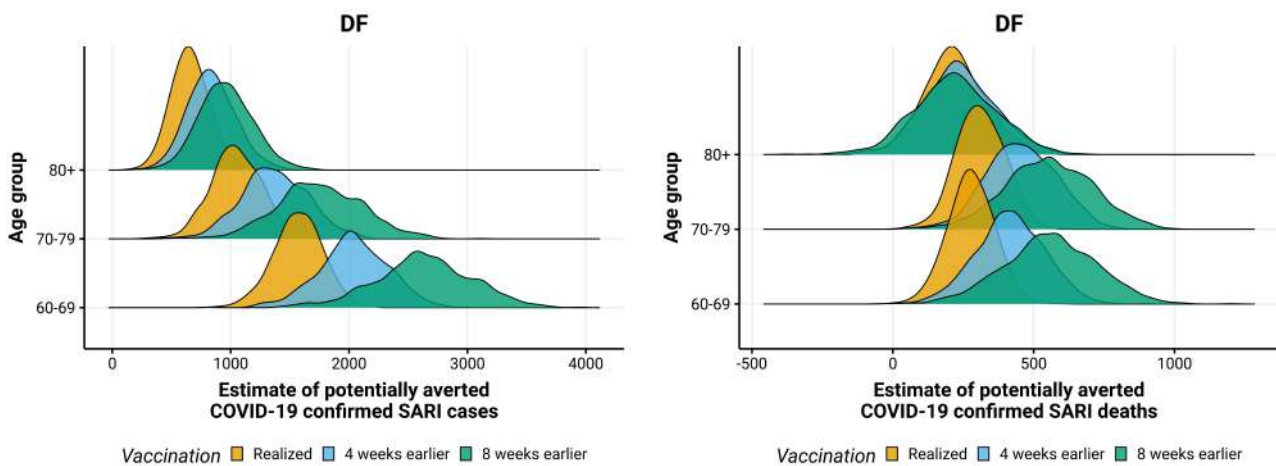

**Figure 50:** Posterior distribution of hospitalizations (left) and deaths (right) potentially averted by vaccination between 2021-01-01 and 2021-08-29 by age group, with the realized (orange), 4 (blue) and 8 weeks earlier (green) vaccination rollout in DF state.

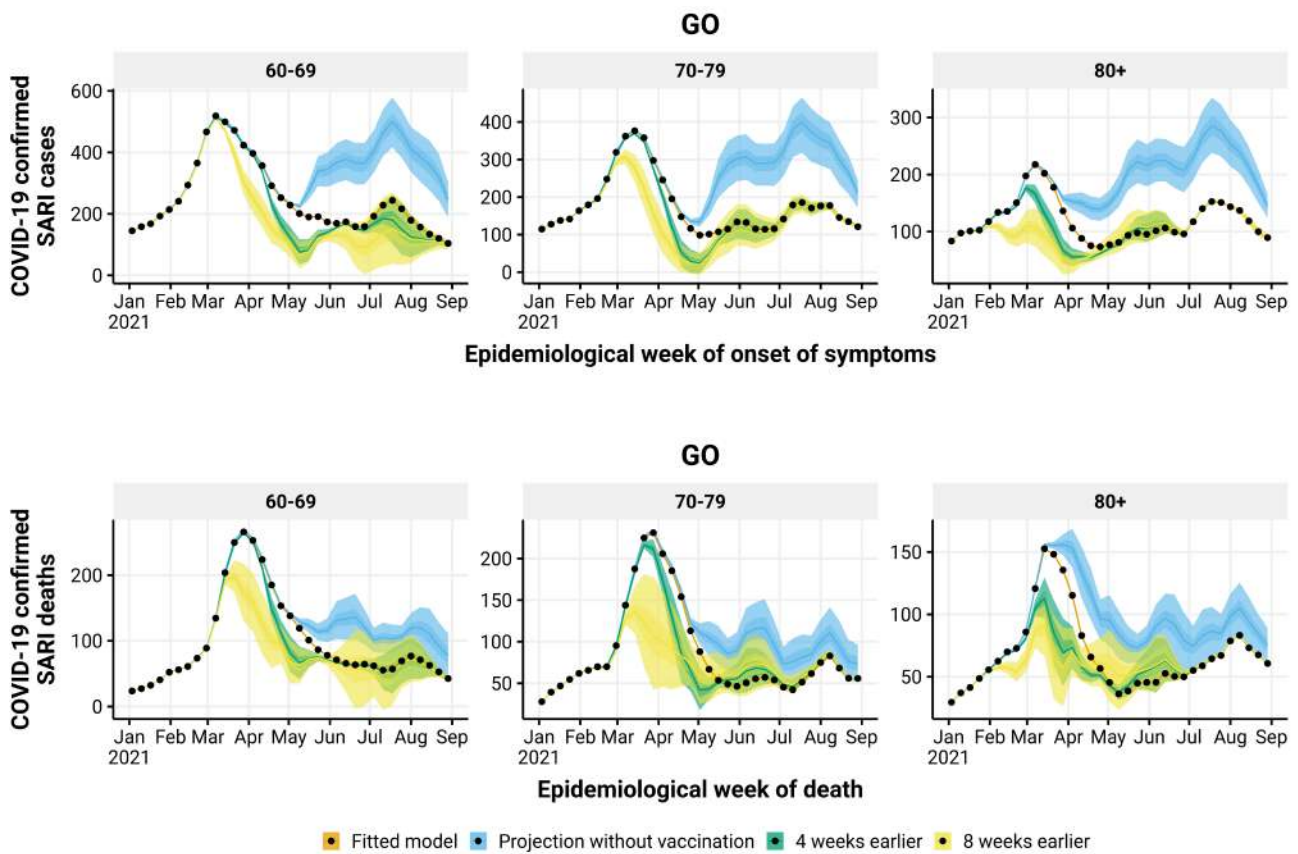

**Figure 51:** Estimated number of hospitalizations (top) and deaths (bottom) by epidemiological week with the realized (orange), no vaccination (blue), 4 (green) and 8 (yellow) weeks earlier vaccination rollout, by age group (panels), in GO state. The observed number of hospitalizations and deaths are given by the black points.

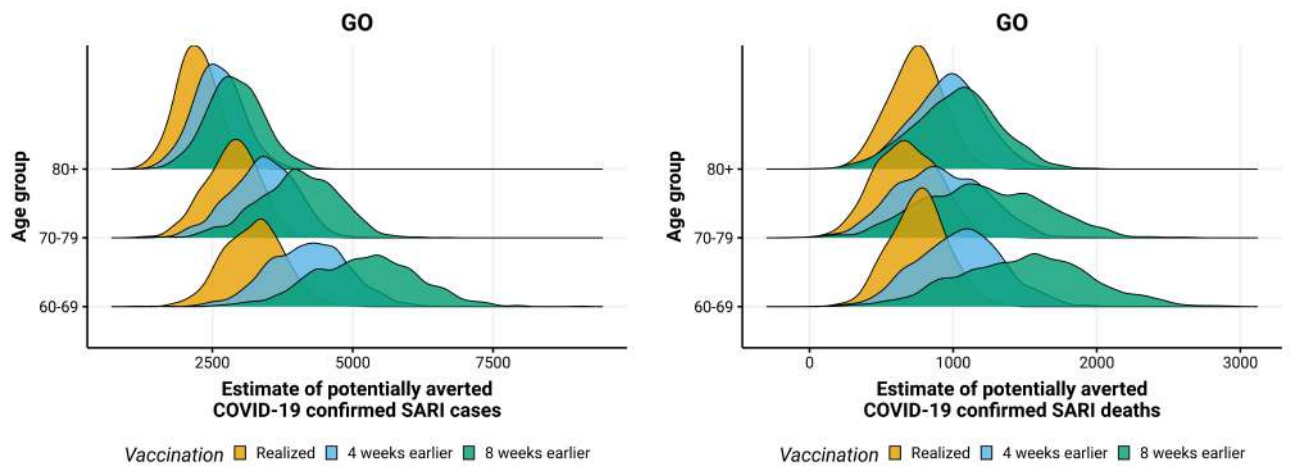

**Figure 52:** Posterior distribution of hospitalizations (left) and deaths (right) potentially averted by vaccination between 2021-01-01 and 2021-08-29 by age group, with the realized (orange), 4 (blue) and 8 weeks earlier (green) vaccination rollout in GO state.

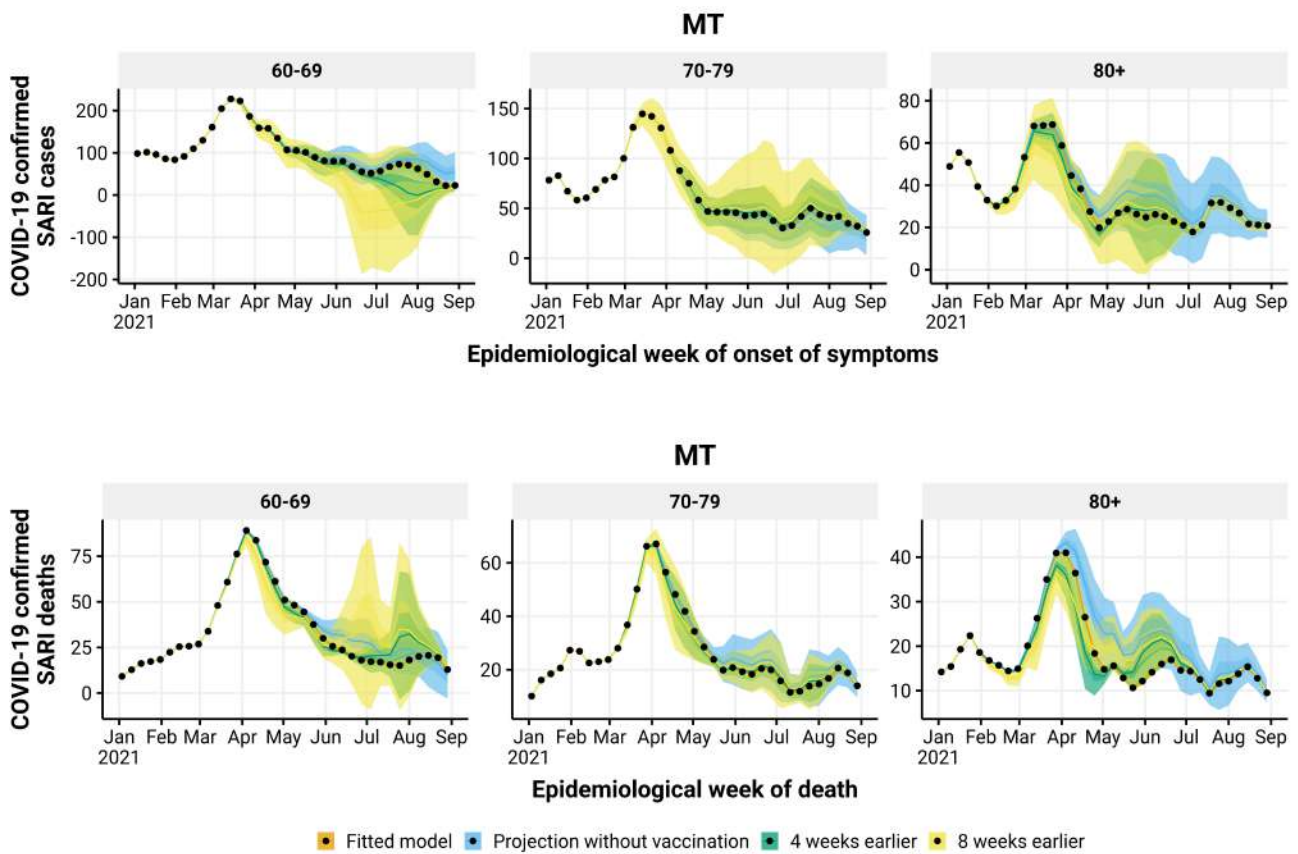

**Figure 53:** Estimated number of hospitalizations (top) and deaths (bottom) by epidemiological week with the realized (orange), no vaccination (blue), 4 (green) and 8 (yellow) weeks earlier vaccination rollout, by age group (panels), in MT state. The observed number of hospitalizations and deaths are given by the black points.

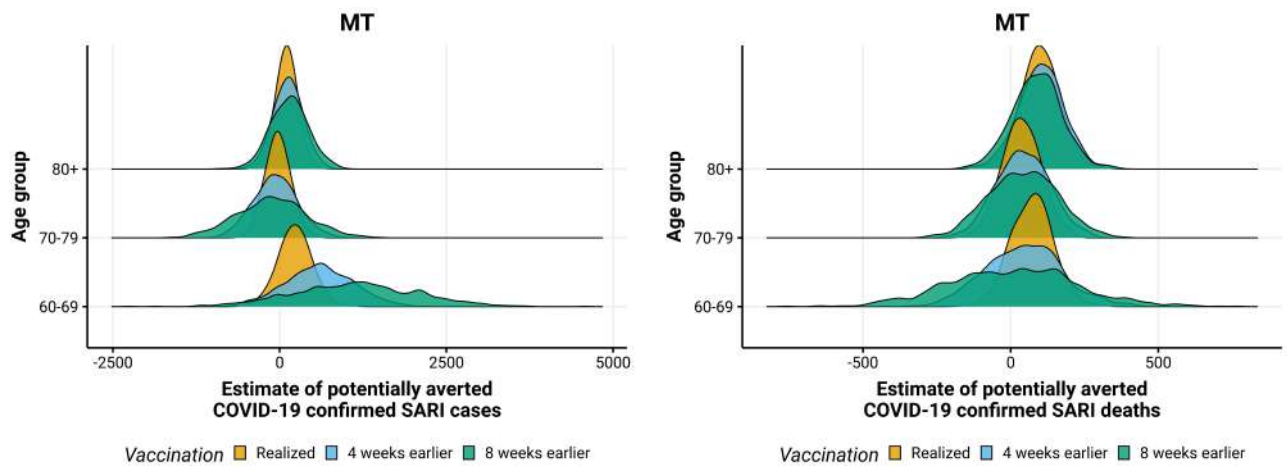

**Figure 54:** Posterior distribution of hospitalizations (left) and deaths (right) potentially averted by vaccination between 2021-01-01 and 2021-08-29 by age group, with the realized (orange), 4 (blue) and 8 weeks earlier (green) vaccination rollout in MT state.

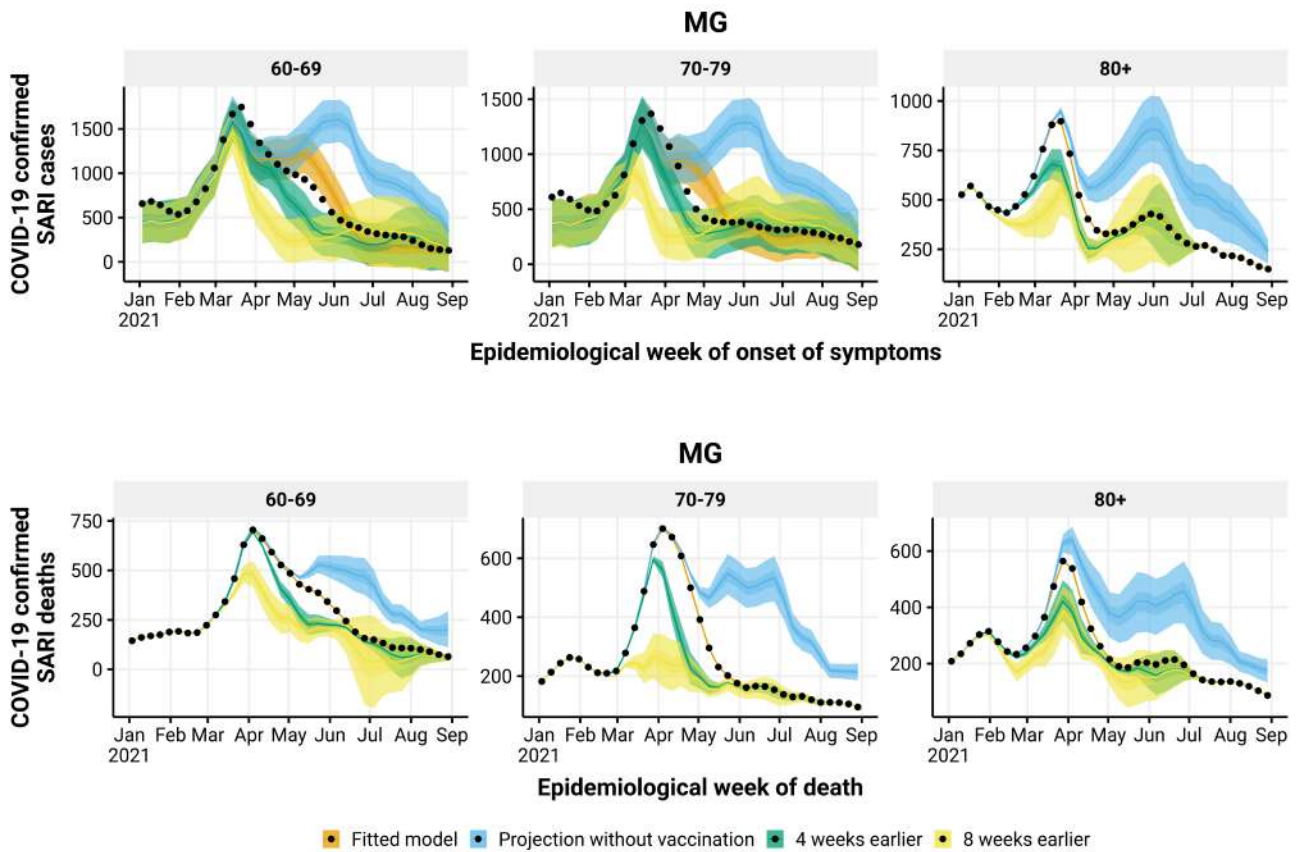

**Figure 55:** Estimated number of hospitalizations (top) and deaths (bottom) by epidemiological week with the realized (orange), no vaccination (blue), 4 (green) and 8 (yellow) weeks earlier vaccination rollout, by age group (panels), in MG state. The observed number of hospitalizations and deaths are given by the black points.



**Figure 56:** Posterior distribution of hospitalizations (left) and deaths (right) potentially averted by vaccination between 2021-01-01 and 2021-08-29 by age group, with the realized (orange), 4 (blue) and 8 weeks earlier (green) vaccination rollout in MG state.
